# Supplementary material for: NOGOB receptor deficiency increases cerebrovascular permeability and hemorrhage via impairing histone acetylation–mediated CCM1/2 expression
Source: JCI journal article supplement (doi:10.1172/jci151382), 2022-03-22

Supplementary figures of manuscript 15138-JCI-RG-RV-2

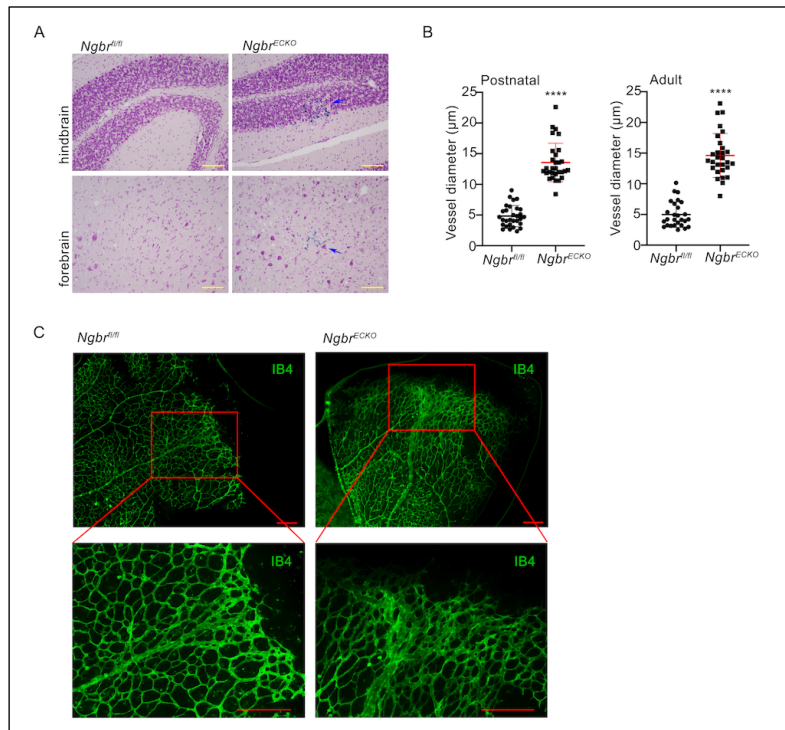

**Figure S1** A. Hemosiderin staining using Iron Stain Kit indicated stale hemorrhage in both forebrain and hindbrain of adult mice. Arrows pointed to the blue-stained positive sites. Scale bar: 50 μm. B. Microvessel diameter was calculated from IB4 staining images of *Ngbr<sup>fl/fl</sup>* and *Ngbr<sup>ECKO</sup>* mice. Results showed microvessel diameter significantly increased in *Ngbr<sup>ECKO</sup>* mice. Images of lesion sites from *Ngbr<sup>ECKO</sup>* group and similar sites from *Ngbr<sup>fl/fl</sup>* group were taken. Microvessels in 6 images randomly selected from 3 mice per group were measured. Data are presented as mean ± SD. Significance was tested by 2-tailed unpaired Student's t-test. \*\*\*\* $P < 0.0001$ . C. Retina were extracted from postnatal (P7) mice of both *Ngbr<sup>fl/fl</sup>* and *Ngbr<sup>ECKO</sup>* groups. ECs were stained with IB4 (green). Results showed that venous vessels in the retina of *Ngbr<sup>ECKO</sup>* group were enlarged. Scale bar: 200 μm.

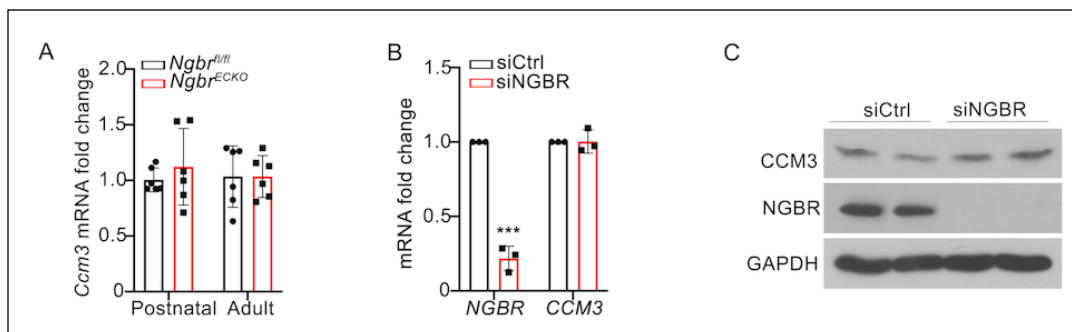

**Figure S2** A. *Ccm3* mRNA levels were detected in MBMVECs isolated from *Ngbr<sup>fl/fl</sup>* and *Ngbr<sup>ECKO</sup>* groups at both postnatal and adult stages. Results showed that the *Ccm3* mRNA level didn't change in *Ngbr<sup>ECKO</sup>* MBMVECs.  $n = 6$  mice per group. B-C. RT-qPCR and western blot showed no significant change of CCM3 expression in *NGBR* deficient HBMVECs. Data are presented as mean ± SD. Significance was tested by 2-tailed unpaired student's t-test. \*\*\* $P < 0.001$ ,  $n = 3$  samples per group.

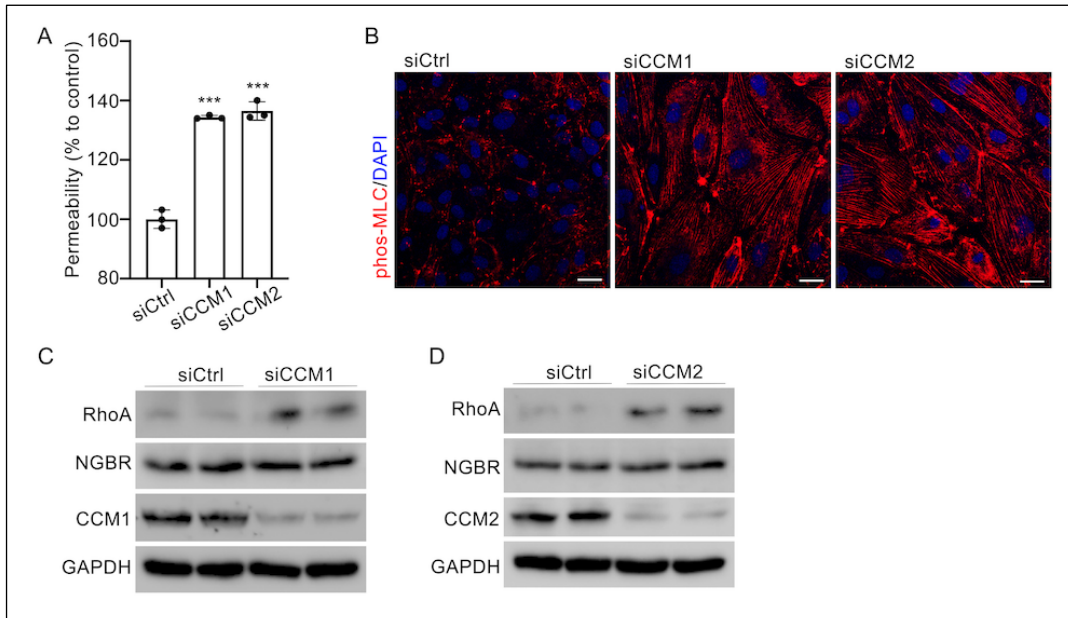

**Figure S3** A. Knockdown of either *CCM1* or *CCM2* significantly increases endothelial permeability. Data are presented as mean  $\pm$  SD. Significance was tested by 2-tailed unpaired student's t-test. \*\*\* $P < 0.001$  vs. siCtrl group,  $n = 3$  samples per group. B-D. Immunofluorescent staining and western blot showed that knockdown of either *CCM1* or *CCM2* increases RhoA expression and phos-MLC signaling. Phos-MLC and RhoA expression was much higher in *CCM1* or *CCM2* knockdown group compared to siCtrl group. Scale bar: 20  $\mu\text{m}$ .

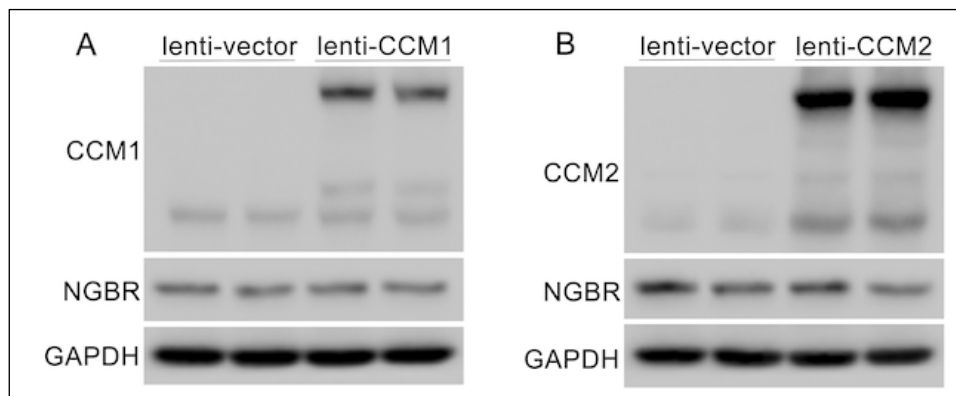

**Figure S4** A-B. Western blot showed that lentivirus transfection efficiency was sufficient. *CCM1* and *CCM2* were overexpressed in HBMVECs when transfected with lentivirus harboring *CCM1* or *CCM2* gene. As noted herein, NGBR protein levels had no change.

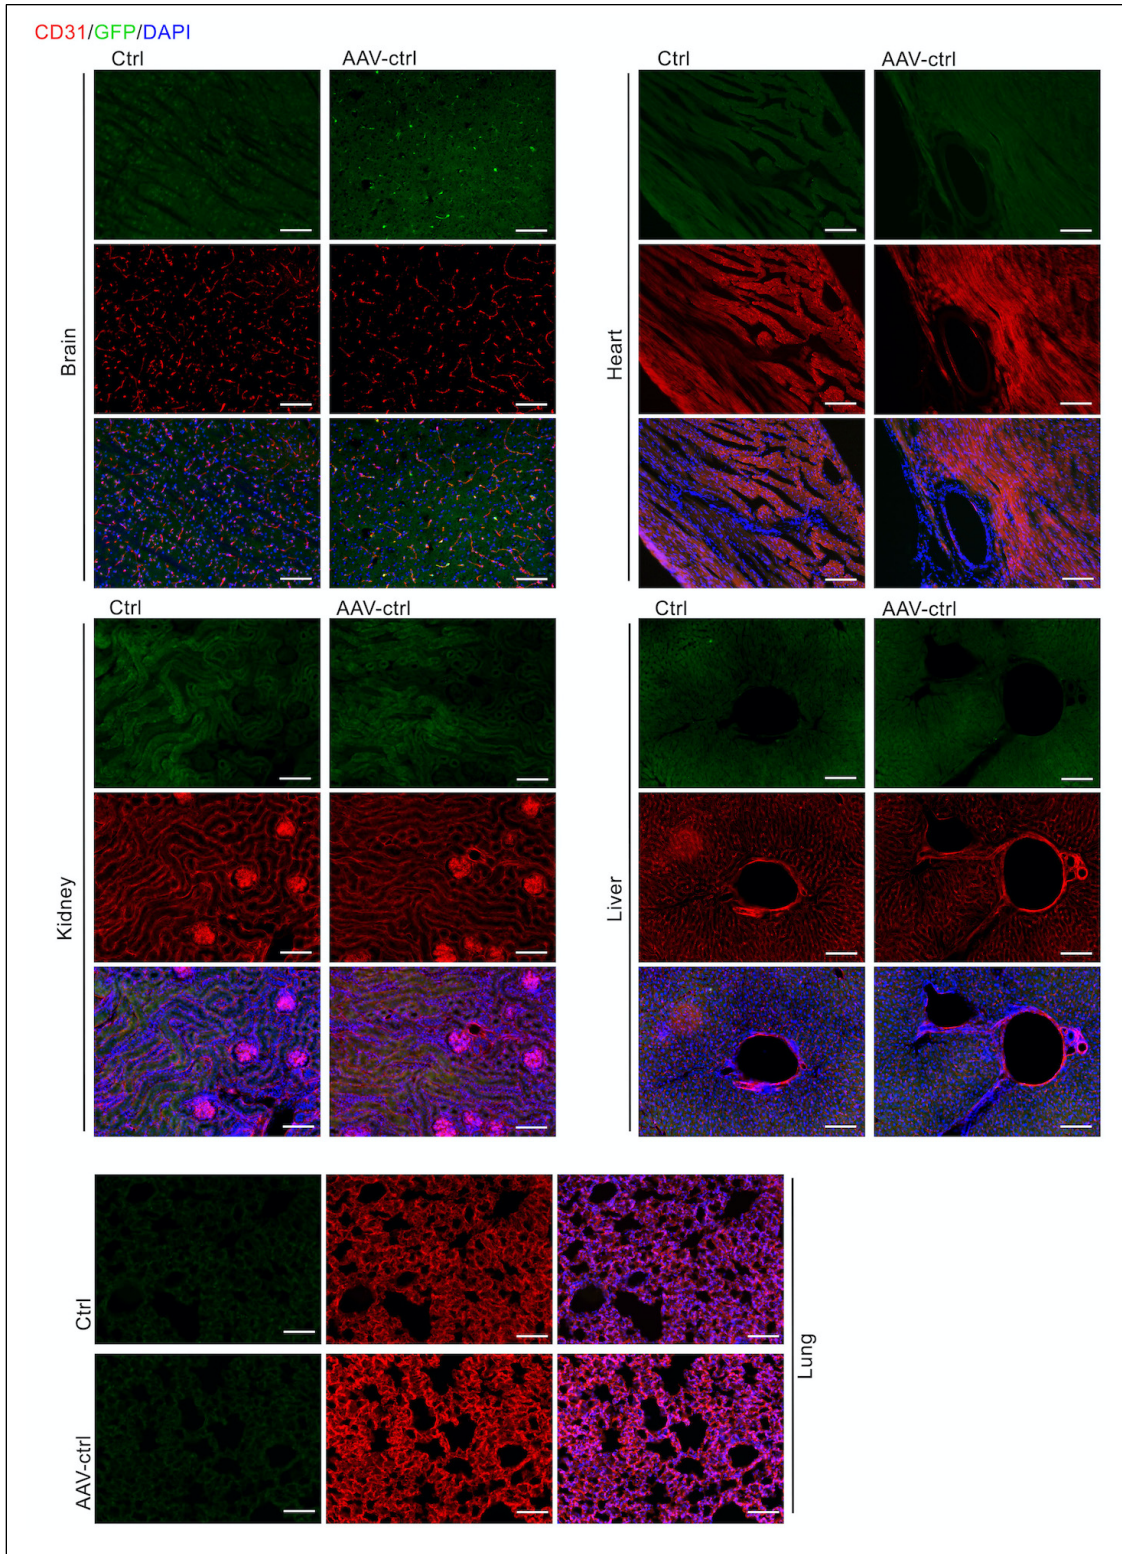

**Figure S5** Mice were injected with AAV-BR1-GFP (AAV-ctrl) and vehicle (Ctrl) via tail vein. Mice were euthanized and perfused by PBS two weeks later. Organs were obtained, fixed, embedded, sectioned, and immunofluorescent stained with CD31, GFP, and DAPI. Results showed that positive GFP staining presented in brain ECs but not in any ECs in the heart, kidney, liver, and lung. Scale bar: 50  $\mu$ m.



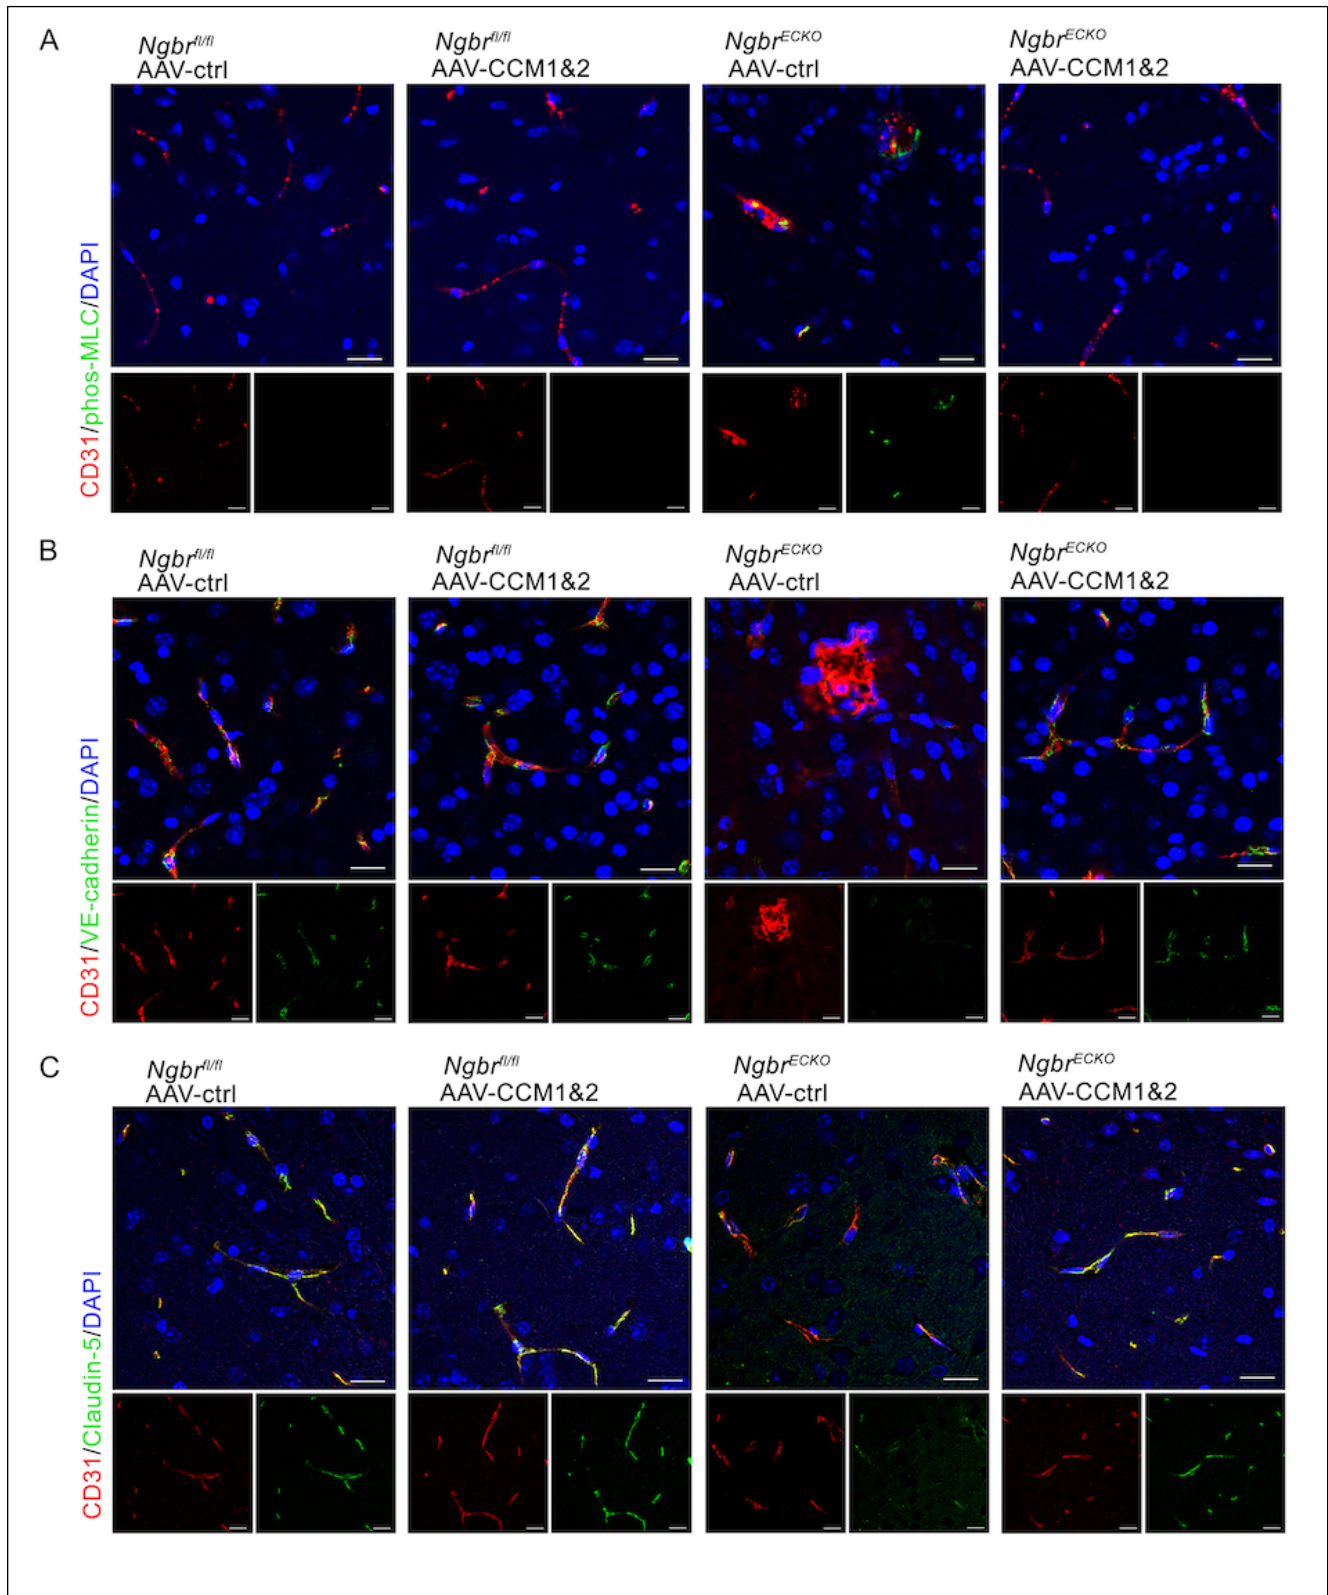

**Figure S6 A-C.** Immunofluorescent staining showed the reduction of phos-MLC (A), as well as restoration of AJs (VE-cadherin, B) and TJs (Claudin-5, C) protein levels in the brain ECs of *Ngbr<sup>ECKO</sup>* mice overexpressing *CCM1* and *CCM2*. Scale bar: 20  $\mu$ m.



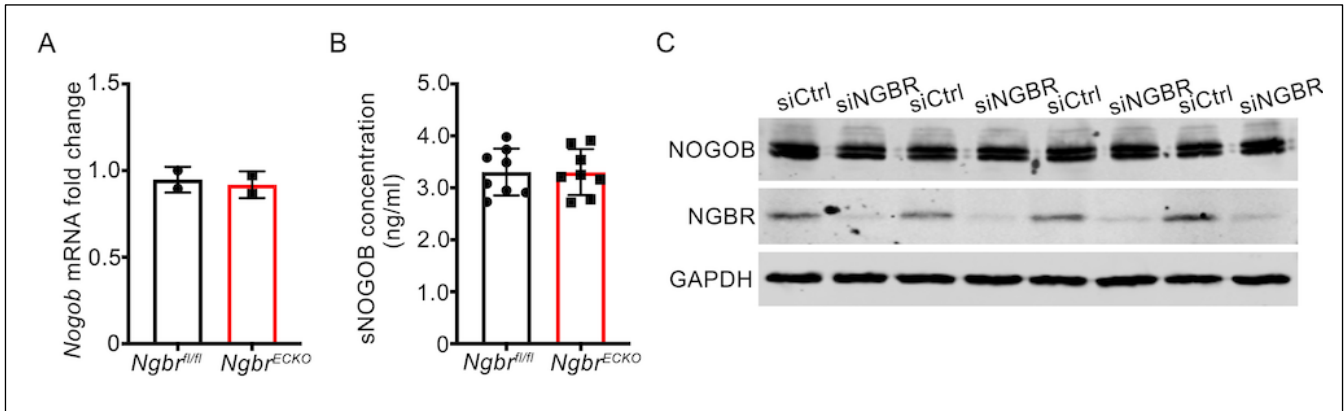

**Figure S7** A. *Nogob* mRNA level did not change in *Ngbr* deficient MBMVECs extracted from *Ngbr*<sup>ECKO</sup> mice. Each point represented an MBMVECs sample from 4 mouse brains. B. The concentration of sNOGOB was detected by ELISA. The levels of NOGOB in serum from *Ngbr*<sup>ECKO</sup> mice are the same as that of *Ngbr*<sup>fl/fl</sup> mice. Data are presented as mean  $\pm$  SD. Significance was tested by 2-tailed unpaired student's t-test. No significant differences were detected. C. NOGOB expression in HBMVECs was detected by western blot. NOGOB expression remained the same under *NGBR* siRNA treatment.

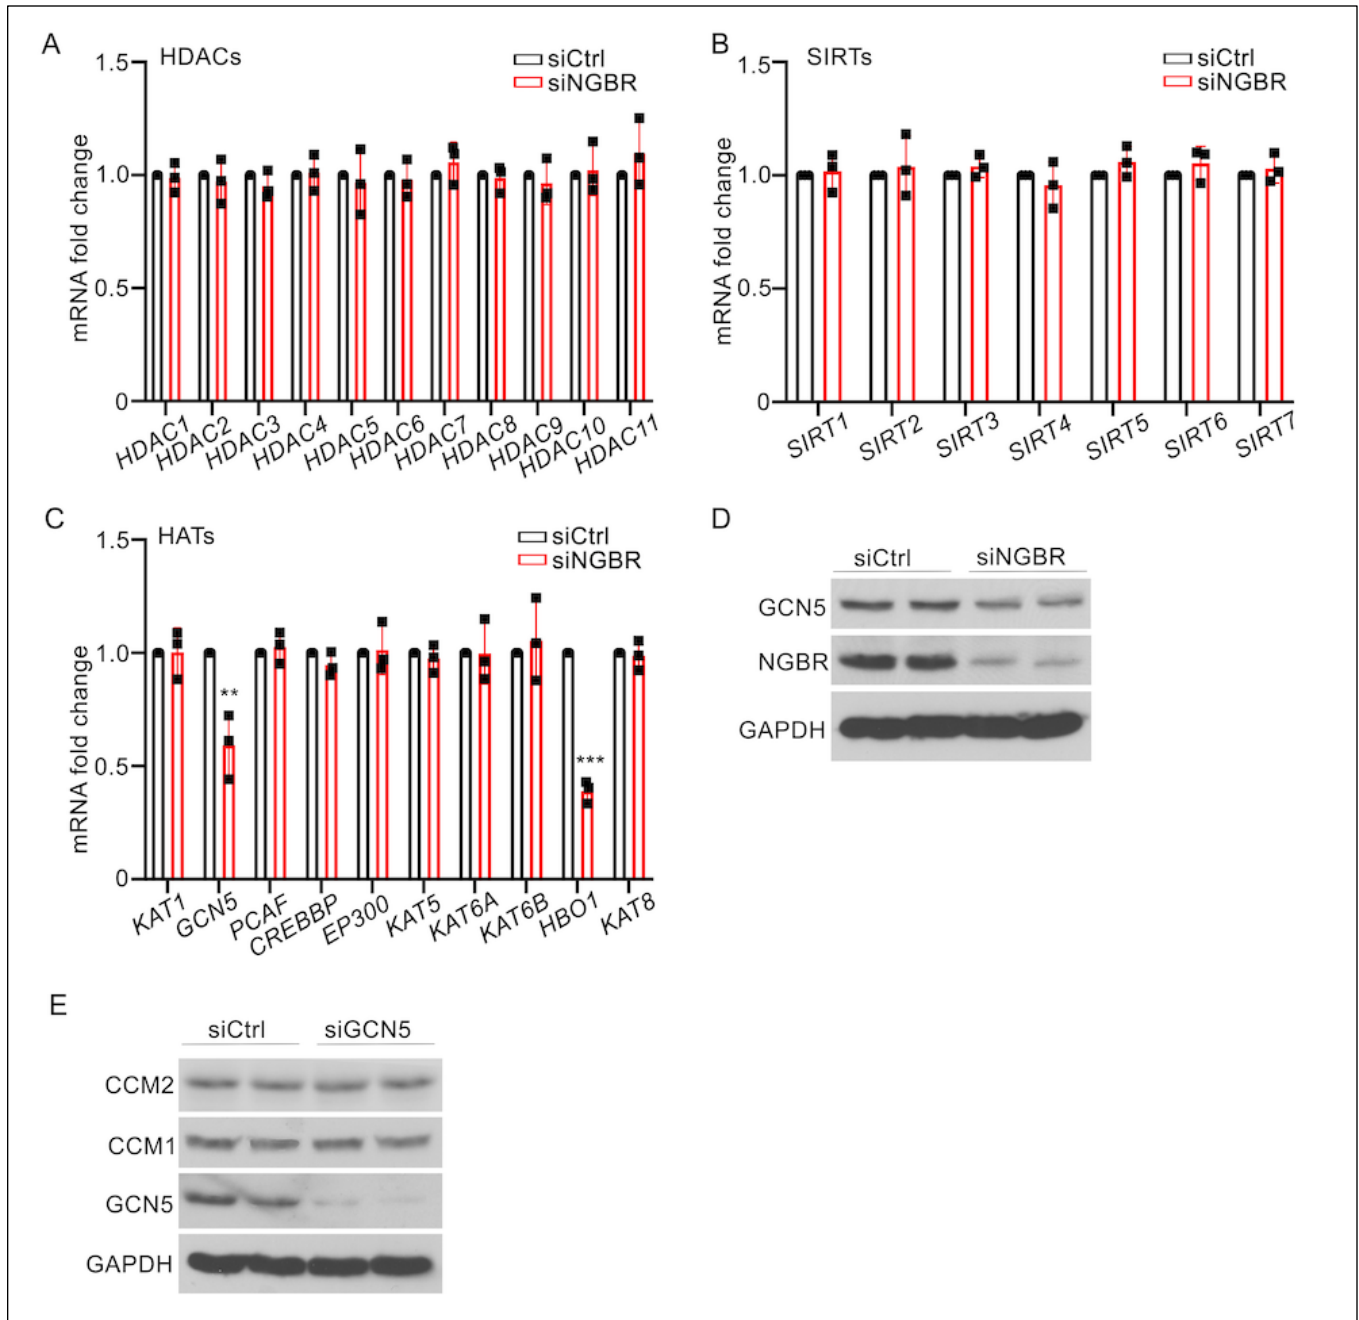

**Figure S8** A-C. HDACs, SIRTs, and HATs expression in RNA-seq data (siNGBR group vs. siCtrl group) were confirmed by RT-qPCR. The results showed that the mRNA level of *HBO1* decreased dramatically, and the mRNA level of *GCN5* also decreased. Data are presented as mean  $\pm$  SD. Significance was tested by 2-tailed unpaired student's t-test. \*\* $P < 0.01$ , \*\*\* $P < 0.001$ .  $n = 3$  samples per group. D-E. Western blot results showed *GCN5* decreased in *NGBR* deficient HBMVECs while *GCN5* siRNA treatment didn't show any influence on *CCM1* and *CCM2* expression in HBMVECs even though the knockdown efficiency was sufficient.

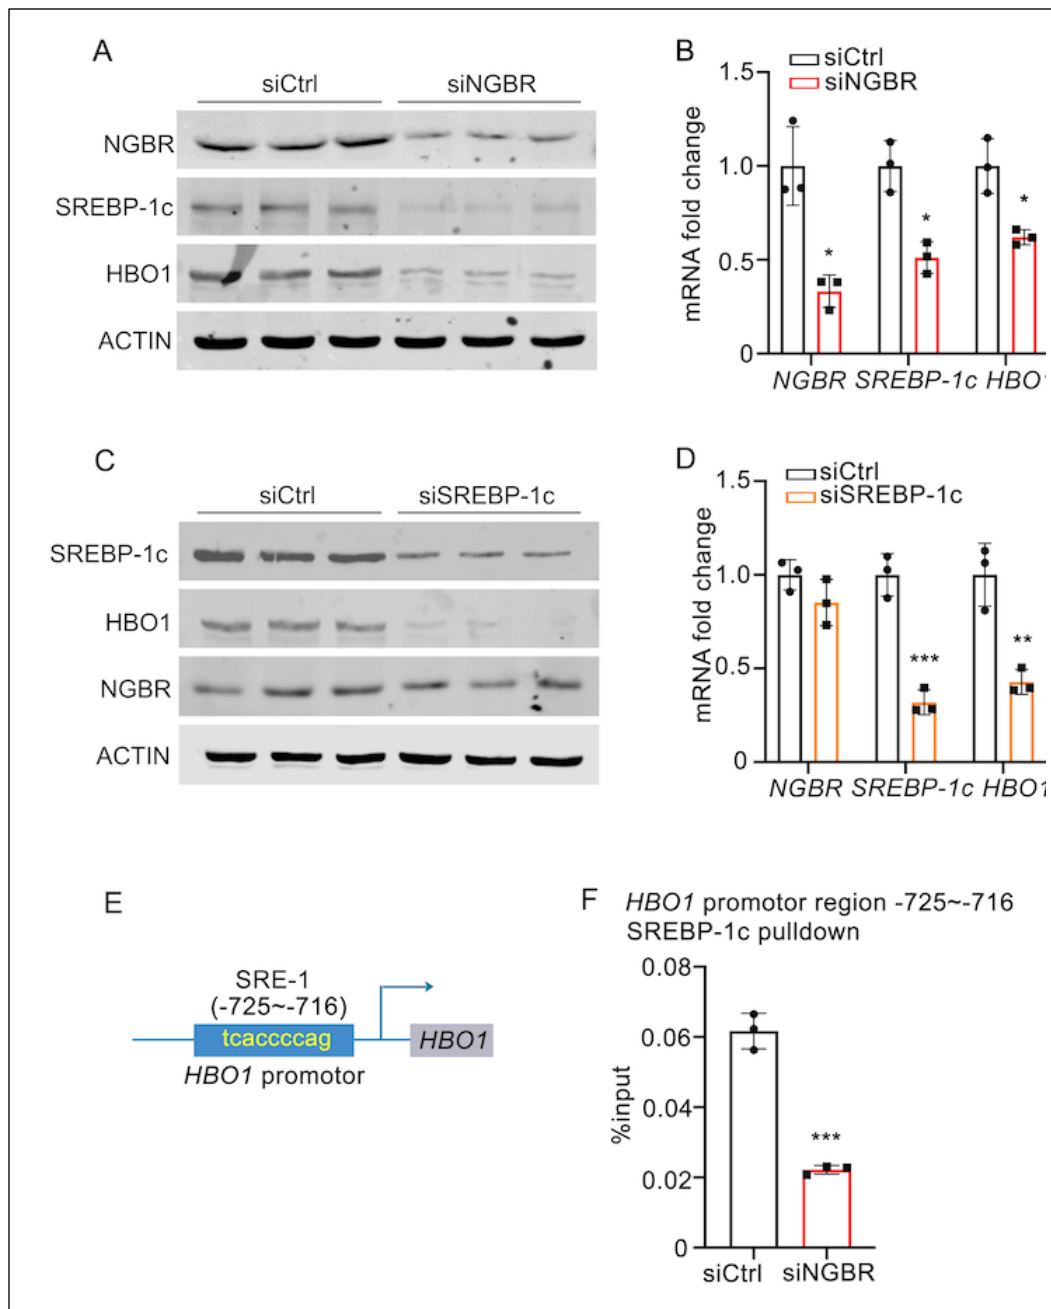

**Figure S9** A-B. Both protein and mRNA levels of SREBP-1c and HBO1 were decreased in *NGBR* knockdown HBMVECs. Data are presented as mean  $\pm$  SD. Significance was tested by 2-tailed unpaired student's t-test.  $*P < 0.05$ ,  $n = 3$  samples per group. C-D. HBO1 protein and mRNA levels were reduced in *SREBP-1c* knockdown HBMVECs. As noted herein, *NGBR* expression did not change. Data are presented as mean  $\pm$  SD. Significance was tested by 2-tailed unpaired student's t-test.  $**P < 0.01$ ,  $***P < 0.001$ ,  $n = 3$  samples per group. E. The binding site of SREBP-1c (SRE-1) on the *HBO1* gene promoter region. F. ChIP-qPCR assays were performed using HBMVECs treated with either control siRNA or *NGBR* siRNA. Chromatin DNA was pulled down using an antibody of SREBP-1c. Results showed that the binding of SREBP-1c on the *HBO1* promoter region (-725~-716) was significantly decreased in *NGBR* deficient HBMVECs. Data are presented as mean  $\pm$  SD. Significance was tested by 2-tailed unpaired student's t-test.  $***P < 0.001$ ,  $n = 3$  samples per group.



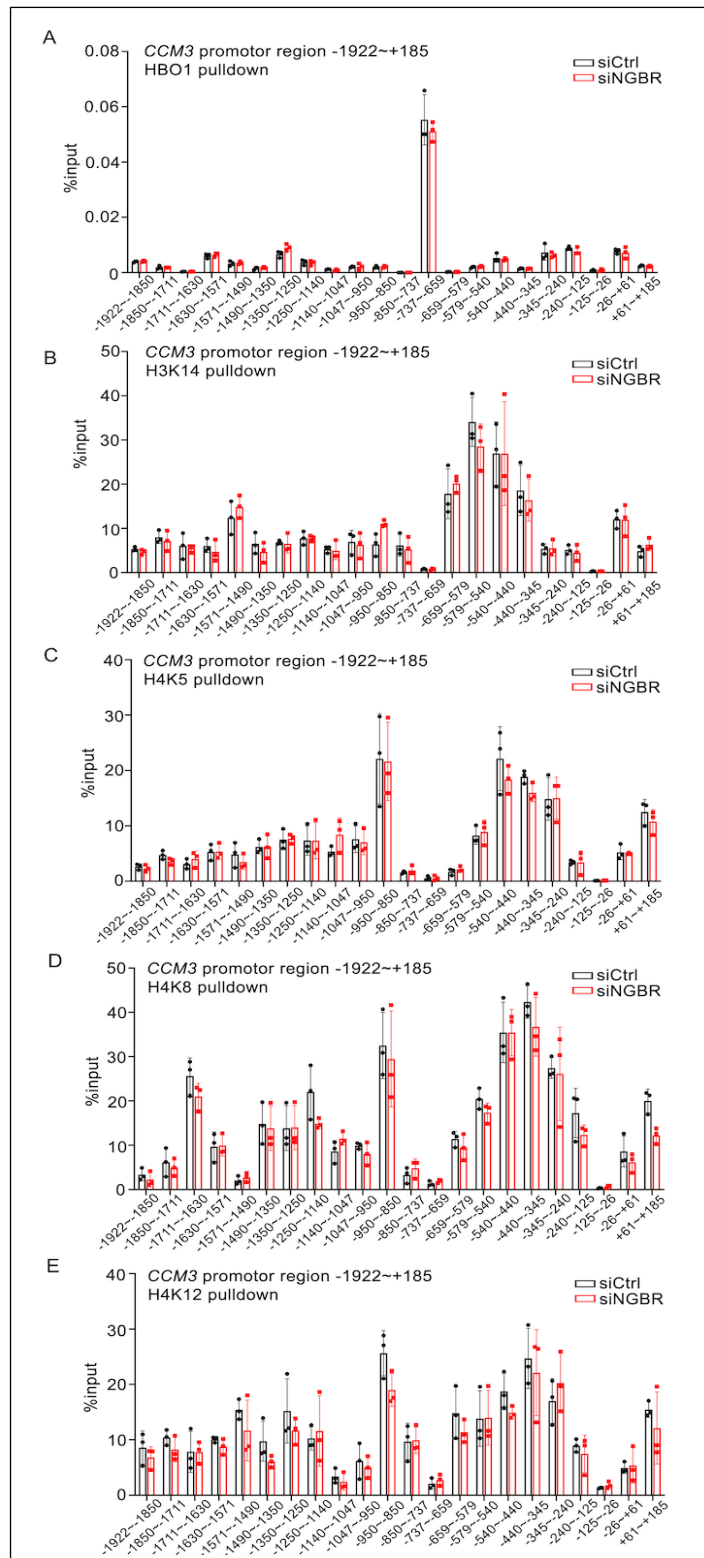

**Figure S10 A-E.** ChIP-qPCR assays were performed using HBMVECs treated with either control siRNA or *NGBR* siRNA. Chromatin DNA was pulled down using antibodies of HBO1, acetylated H3K14, H4K5, H4K8, and H4K12. Chromatin DNA pulled down using IgG and H3 was performed as the negative and positive control (data not shown). Results showed that *NGBR* knockdown did not affect the binding of HBO1, acetylated H3K14, and acetylated H4K5/K8/K12 on the promoter region of the *CCM3* gene. Data are presented as mean  $\pm$  SD. Significance was tested by 2-tailed unpaired student's t-test.

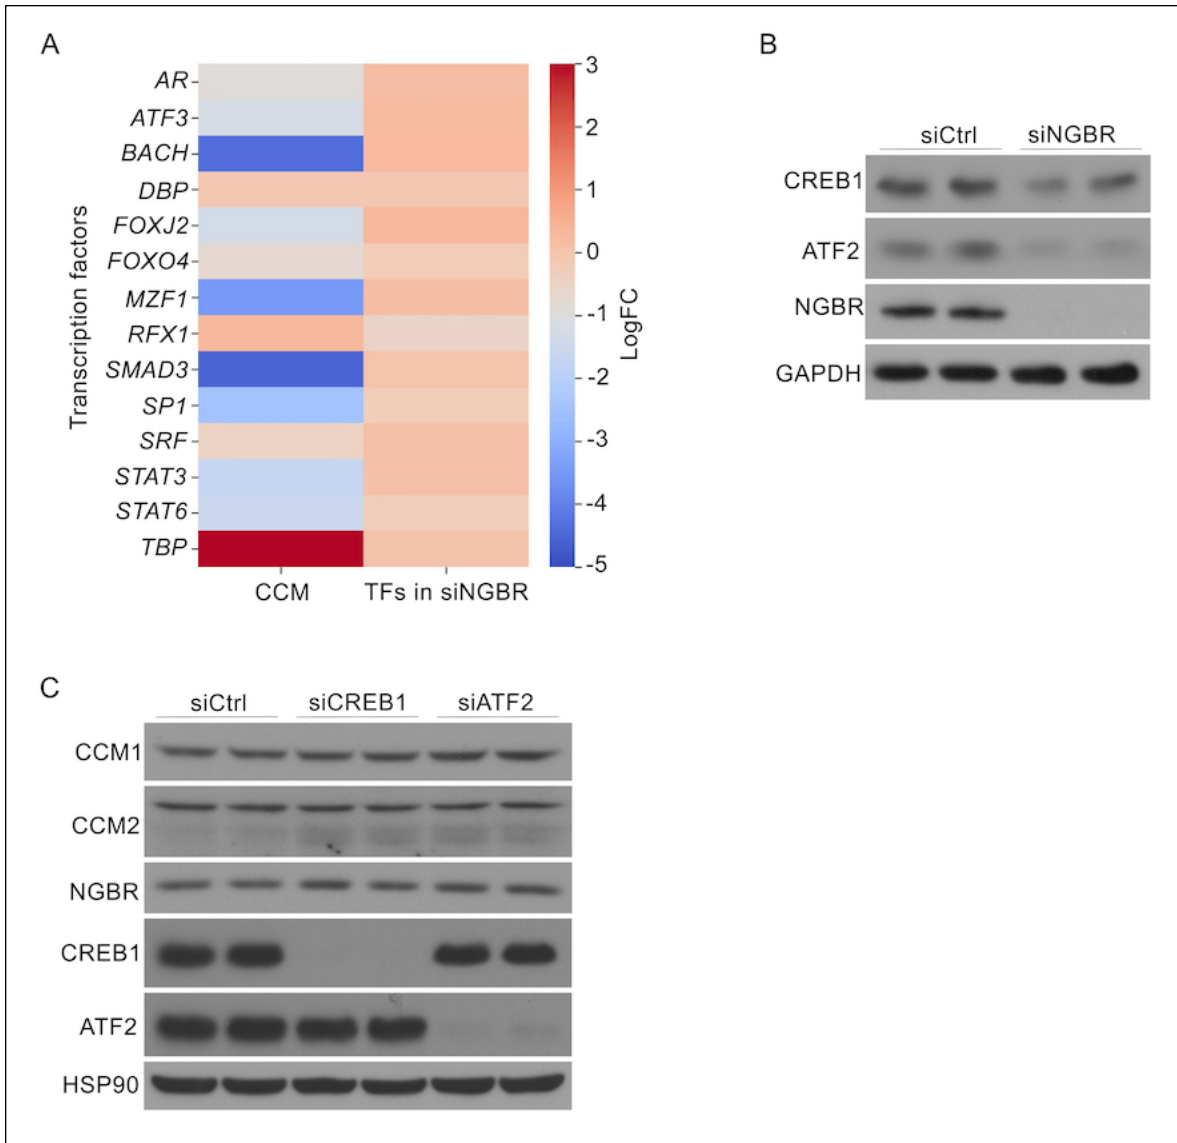

**Figure S11** A. GSEA analysis of siNGBR RNA sequencing data utilizing transcription factor geneset generated report was performed. Log fold change was compared among significantly enriched transcription factors ( $P < 0.05$ , FDR  $q$ -value $<0.25$ ). Comparison between the CCM group and the transcription factors enriched in the NGBR knockdown experimental group does not show a direct correlation. B. Transcription factors CREB1 and ATF2 downregulated in *NGBR* deficient HBMVECs. C. The knockdown of either *CREB1* or *ATF2* does not affect CCM1 and CCM2 expression.

**Supplementary Table 1: Chemicals, plasmids, antibodies and siRNAs used in the study**

| <b>Name</b>                                           | <b>Cat#</b> | <b>Company</b>           |
|-------------------------------------------------------|-------------|--------------------------|
| Tamoxifen                                             | T5648       | Sigma-Aldrich            |
| Evans Blue                                            | E2129       | Sigma-Aldrich            |
| FITC-conjugated dextran                               | FD2000S     | Sigma-Aldrich            |
| FITC-conjugated dextran                               | FD40S       | Sigma-Aldrich            |
| Hematoxylin                                           | MHS16       | Sigma-Aldrich            |
| alcoholic eosin Y                                     | 1024390500  | Sigma-Aldrich            |
| VECTASTAIN® Elite ABC-HRP Kit, Peroxidase (Mouse IgG) | PK-6102     | Vector Laboratory        |
| Iron Stain Kit                                        | HT20-1KT    | Sigma-Aldrich            |
| TritonX-100                                           | 10789704001 | Sigma-Aldrich            |
| Tween-20                                              | P1379       | Sigma-Aldrich            |
| Paraformaldehyde                                      | 158127      | Sigma-Aldrich            |
| collagenase II                                        | 17101015    | Thermo Fisher Scientific |
| DNase I                                               | 10104159001 | Sigma-Aldrich            |
| Percoll                                               | P1644       | Sigma-Aldrich            |
| collagenase/dispase                                   | SCR139      | Sigma-Aldrich            |
| SimpleChIP (R) Plus Kits                              | 9004&9005   | Cell Signaling           |
|                                                       |             |                          |
| <b>plasmids</b>                                       |             |                          |
| psPAX2                                                | #12260      | Addgene                  |
| pVSV-G                                                | #12259      | Addgene                  |
| pWPXLD                                                | #12258      | Addgene                  |
|                                                       |             |                          |
| <b>antibodies</b>                                     |             |                          |
| Isolectin B4                                          | I21412      | Thermo Fisher Scientific |
| DAPI                                                  | D9542       | Sigma-Aldrich            |
| CD31 antibody                                         | AP436PU-N   | Acris                    |
| CD31 antibody                                         | 550274      | BD pharmacy              |
| phos-MLC antibody                                     | 3671S       | Cell Signaling           |
| VE-cadherin antibody                                  | 550548      | BD pharmacy              |
| VE-cadherin antibody                                  | 2500S       | Cell Signaling           |
| Claudin-5 antibody                                    | 34-1600     | Thermo Fisher Scientific |
| ZO-1 antibody                                         | 40-2200     | Thermo Fisher Scientific |
| GFP antibody                                          | 50430-2-AP  | Proteintech              |
| GFP antibody                                          | GFP-1010    | Aves                     |
| RhoA antibody                                         | 2117S       | Cell Signaling           |
| NGBR antibody                                         | ab168351    | Abcam                    |
| GAPDH antibody                                        | 60004-1-Ig  | Proteintech              |
| ACTIN antibody                                        | 66009-1-Ig  | Proteintech              |
| CCM1 antibody                                         | ab196025    | Abcam                    |



|                                                       |                                                                                       |                             |
|-------------------------------------------------------|---------------------------------------------------------------------------------------|-----------------------------|
| CCM2 antibody                                         | 26270-1-AP                                                                            | Proteintech                 |
| CCM3 antibody                                         | 66440-1-Ig                                                                            | Proteintech                 |
| HBO1 antibody                                         | Ab70183                                                                               | Abcam                       |
| HBO1 antibody                                         | 58418                                                                                 | Cell Signaling              |
| GCN5 antibody                                         | 3305S                                                                                 | Cell Signaling              |
| Histone H3 (D1H2) XP®<br>Rabbit mAb                   | 4499                                                                                  | Cell Signaling              |
| Acetyl-Histone H3 (Lys9)<br>(C5B11) Rabbit mAb        | 9649                                                                                  | Cell Signaling              |
| Acetyl-Histone H3<br>(Lys14) (D4B9) Rabbit<br>mAb     | 7627                                                                                  | Cell Signaling              |
| Acetyl-Histone H3<br>(Lys18) (D8Z5H) Rabbit<br>mAb    | 13998                                                                                 | Cell Signaling              |
| Acetyl-Histone H3<br>(Lys27) (D5E4) XP®<br>Rabbit mAb | 8173                                                                                  | Cell Signaling              |
| Histone H4 (L64C1)<br>Mouse mAb                       | 2935                                                                                  | Cell Signaling              |
| Acetyl-Histone H4 (Lys5)<br>(D12B3) Rabbit mAb        | 8647                                                                                  | Cell Signaling              |
| Acetyl-Histone H4 (Lys8)<br>Antibody                  | 2594                                                                                  | Cell Signaling              |
| Acetyl-Histone H4<br>(Lys12) (D2W6O) Rabbit<br>mAb    | 13944                                                                                 | Cell Signaling              |
| SREBP-1c antibody                                     | ab28481                                                                               | Abcam                       |
|                                                       |                                                                                       |                             |
| <b>siRNAs</b>                                         |                                                                                       |                             |
| <i>CCM1</i> siRNA                                     | sc-43884                                                                              | Santa Cruz<br>Biotechnology |
| <i>CCM2</i> siRNA                                     | sc-62594                                                                              | Santa Cruz<br>Biotechnology |
| <i>HBO1</i> siRNA                                     | forward sequence:<br>GGCUAAGCCAGAGUUCUCA;<br>reverse sequence:<br>UGAGAACUCUGGCUUAGCC | Generated from IDT          |
| <i>GCN5</i> siRNA                                     | sc-37946                                                                              | Santa Cruz<br>Biotechnology |
| <i>NGBR</i> siRNA                                     | forward sequence:<br>GGAAAUACAUAGACCUACA;<br>reverse sequence:<br>UGUAGGUCUAUGUAUUUCC | Generated from IDT          |

|                       |          |                             |
|-----------------------|----------|-----------------------------|
| <i>SREBP-1c</i> siRNA | sc-36557 | Santa Cruz<br>Biotechnology |
|-----------------------|----------|-----------------------------|

**Supplementary Table 2: Oligonucleotide sequences of primers used**

| <b>RT-PCR primers</b>      | Forward (5'-3')          | Reverse (5'-3')          |
|----------------------------|--------------------------|--------------------------|
| <i>Ngbr</i> (mouse)        | TCCTACATTAGCGTCTACGACC   | GCTCTCACAAATATCCGCTTTTCC |
| <i>NGBR</i> (human)        | TGCCAGTGAGATGCCCAGAAGCAA | TGATGTGCCAGGGAAGAAAGCCTA |
| <i>Ccm1</i> (mouse)        | GAAAGACGCCATTAACAAGCC    | CCGCATTCCCTCCATTATCTG    |
| <i>Ccm2</i> (mouse)        | AGAAAGCCCATGAGAAGGTG     | CGGGAATGGATGTGAACTGACC   |
| <i>CCM1</i> (human)        | CTGTAAGAACATGCGCTGAAG    | TCCATCGTACCTGTTACCAAAC   |
| <i>CCM2</i> (human)        | AGAAAGCCCATGAGAAGGTG     | CCTGGTATGGACGTTAACTGAC   |
| <i>Hbo1</i> (mouse)        | CCCGCTGTATCATAACCTCTC    | AGCCACCTTTTCCTTATACCG    |
| <i>HBO1</i> (human)        | AGCCCTTCCTGTTCTATGTTATG  | CATAGCCCTGTCTCATGTACTG   |
| <i>GAPDH</i> (human)       | TGGACAGTCAGCCGCATCTTCTTT | ACCAAATCCGTTGACTCCGACCTT |
| <i>Gapdh</i> (mouse)       | CTGGAGAAACCTGCCAAGTA     | TGTTGCTGTAGCCGTATTCA     |
| <i>ACTIN</i> (human)       | TTCTACAATGAGCTGCGTGTGGCT | TAGCACAGCCTGGATAGCAACGTA |
| <i>Actin</i> (mouse)       | GGCTGTATTCCCCTCCATCG     | CCAGTTGGTAACAATGCCATGT   |
| <i>HDAC1</i> (human)       | GAGATGACCAAGTACCACAGC    | TGACAGAACTCAAACAGGCC     |
| <i>HDAC2</i> (human)       | TGACAAACCAGAACACTCCAG    | CTTCTCCATCTTCATCTCCACTG  |
| <i>HDAC3</i> (human)       | GGACTTCTACCAACCCACG      | CAGCACGAGTAGAGGGATATTG   |
| <i>HDAC4</i> (human)       | ACAAGGAGAAGGGCAAAGAG     | GCGTTTTCCCGTACCAGTAG     |
| <i>HDAC5</i> (human)       | TCACCGCAAACTCCTACAG      | AGTTCCCGTTGTCATAGCG      |
| <i>HDAC6</i> (human)       | TTCAACTCTGTGGCTGTGG      | GCAGGGACACATATAGCACAC    |
| <i>HDAC7</i> (human)       | GCAGATCATTCAACAGCCATG    | TTGGTAGAAGGTTTGCTGGG     |
| <i>HDAC8</i> (human)       | AATTAActGGTCTGGAGGTG     | TGCAGATCCAATCCACGTAG     |
| <i>HDAC9</i> (human)       | ACACATTACCAGGAGCACAAG    | CAACATTTCCATCCTTCCGC     |
| <i>HDAC10</i> (human)      | AGAAACACGGGCTACACAG      | GGTGCCAGGAGAAGTAAAGG     |
| <i>HDAC11</i> (human)      | GTTTCTGTTTGAGCGTGTGG     | GGTAGATGTGGCGGTTGTAG     |
| <i>SIRT1</i> (human)       | CCCTCAAAGTAAGACCAGTAGC   | CACAGTCTCCAAGAAGCTCTAC   |
| <i>SIRT2</i> (human)       | ACCTTCTACACATCACACTGC    | GACGATATCAGGCTTCACCAG    |
| <i>SIRT3</i> (human)       | TCATGGAACCTTTGCCTCTG     | GCTCCCCAAAGAACACAATG     |
| <i>SIRT4</i> (human)       | TCGGAAAGCTGTAActGGTTG    | TCTGTTCCCACAATCCAAG      |
| <i>SIRT5</i> (human)       | GCCTCCCGCAGAATTGGTA      | AGAGGTCGCATCAGGGTTTG     |
| <i>SIRT6</i> (human)       | AGGATGTCGGTGAATTACGC     | GAAGACTGCCAGACCAGC       |
| <i>SIRT7</i> (human)       | AGAAAGGGAGAAGCGTTAGTG    | GAGCCCGTCACAGTTCTG       |
| <i>KAT1</i> (human)        | ACTCCATTTCAAGGTCAAGGC    | CTTCACAAGCACAAAGTCTCG    |
| <i>GCN5</i> (human)        | TCTCTACTTCCCTCACCTACGC   | ATTCAGCTCACACTCCATCAG    |
| <i>PCAF</i> (human)        | GAAGAGAACAGAAGCTCCAGG    | GCAATTGGTAAAGACTCGCTG    |
| <i>CREBBP</i> (human)      | CAACCCCAAAAGAGCCAAAC     | GGTTCCCACTGTTTAAAGGC     |
| <i>EP300</i> (human)       | GACCAGACTACAGAAGCAGAAC   | ACTGCCACGGATCATACTTG     |
| <i>KAT5</i> (human)        | CATCGTGGGCTACTTCTCC      | CCTGTTTTCCCTTCCACTTTG    |
| <i>KAT6A</i> (human)       | ACATCACTTCCACACTCCAC     | CATCTACAGGTCGCAAATTCAG   |
| <i>KAT6B</i> (human)       | GACAAACAGAGGAAGAGGAAGG   | TCGGGATTGTCTTTACTGCC     |
| <i>KAT8</i> (human)        | CAAGATCACTCGCAACCAAAAG   | TGTCCACATACTTCACCTTGG    |
| <i>SREBP-1c</i><br>(human) | CAACACAGCAACCAGAACTC     | CTCCACCTCAGTCTTCACG      |
|                            |                          |                          |
| <b>ChIP assay primers</b>  | Forward (5'-3')          | Reverse (5'-3')          |
| <i>CCM1</i> promotor       | ATACAGGGGAGCGCTCCATTC    | TAAAAGTGCTCTGCAGGGCTG    |
| <i>CCM2</i> promotor       | CTTGcAGTGAGCCGAGATC      | GCACAGCTAGAATGTAAACTGTG  |



|                      |                     |                      |
|----------------------|---------------------|----------------------|
| <i>HBO1</i> promotor | GTACTGCATTCCCCACTTC | CCATTCTCCAGAAGCTGCAG |
|----------------------|---------------------|----------------------|

Full unedited gel for Figure 3D

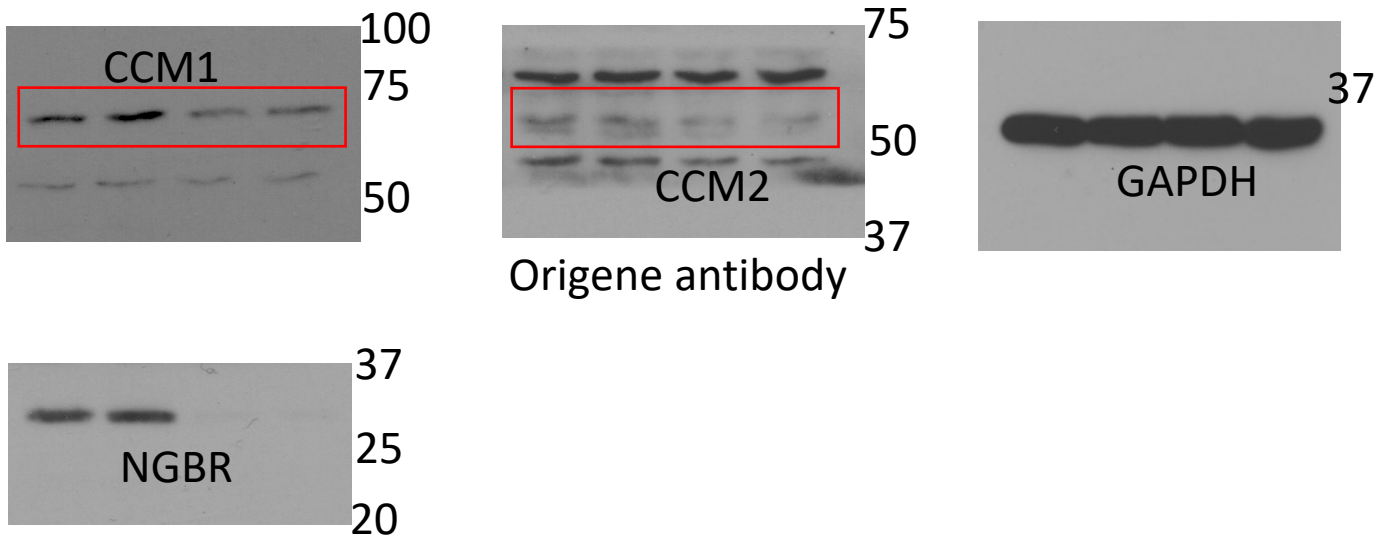

Full unedited gel for Figure 3H

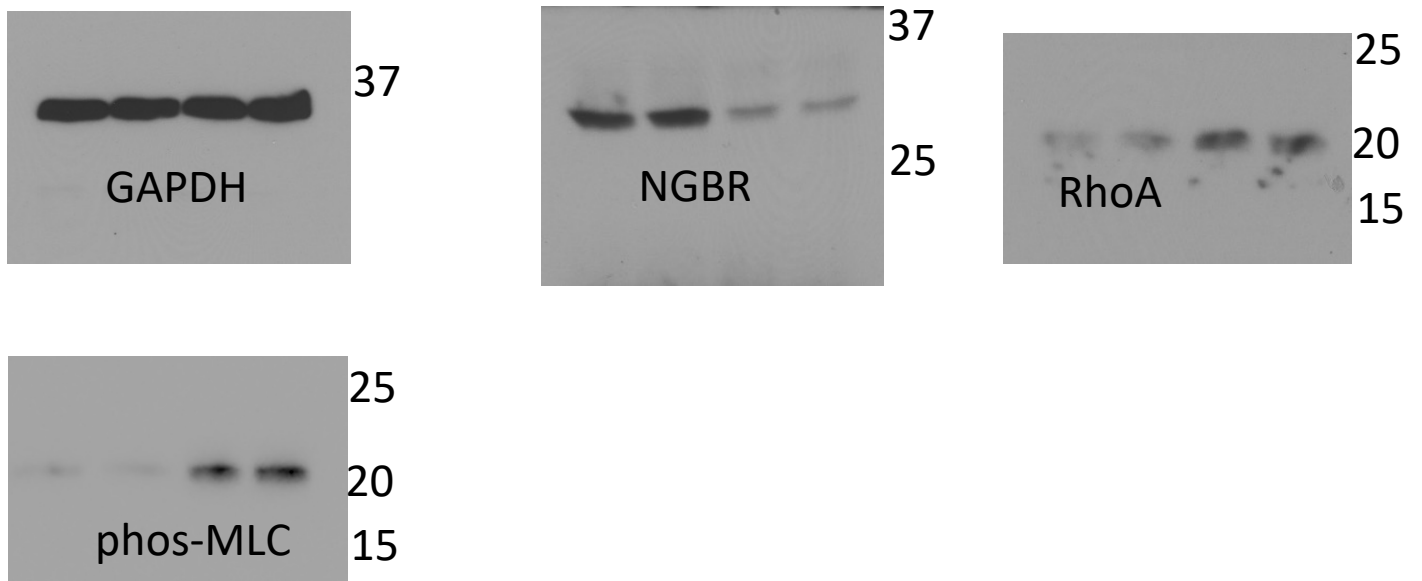

Full unedited gel for Figure 4D

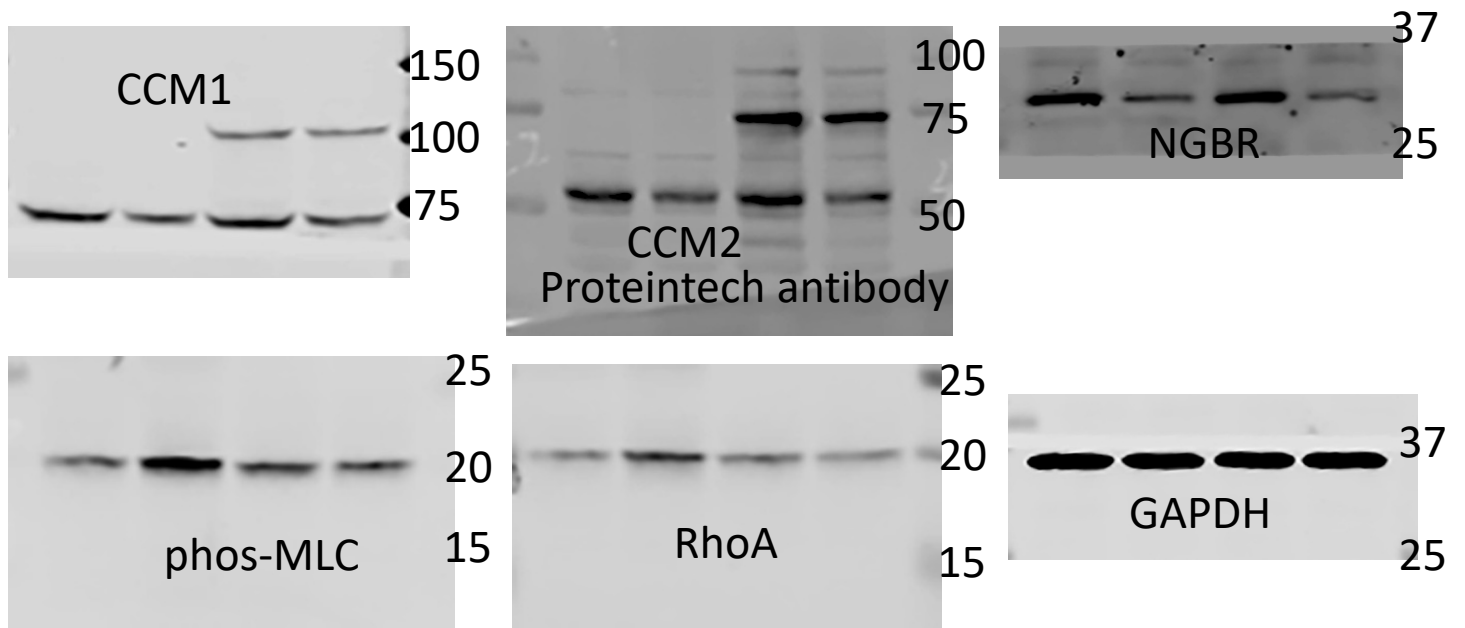



Full unedited gel for Figure 5B

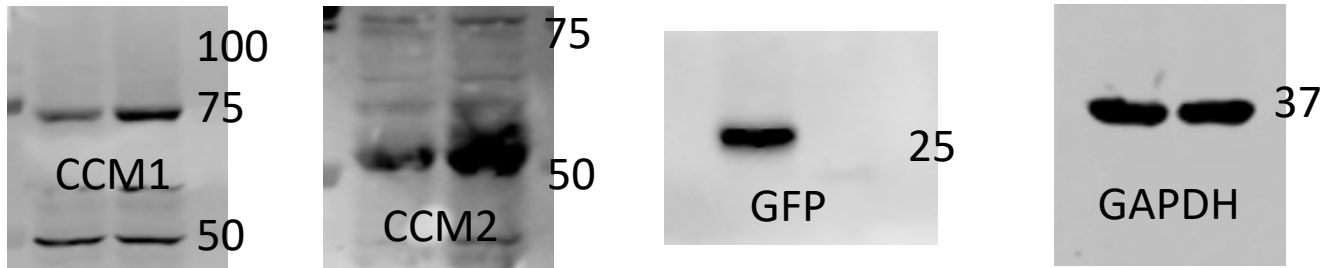

Full unedited gel for Figure 5G

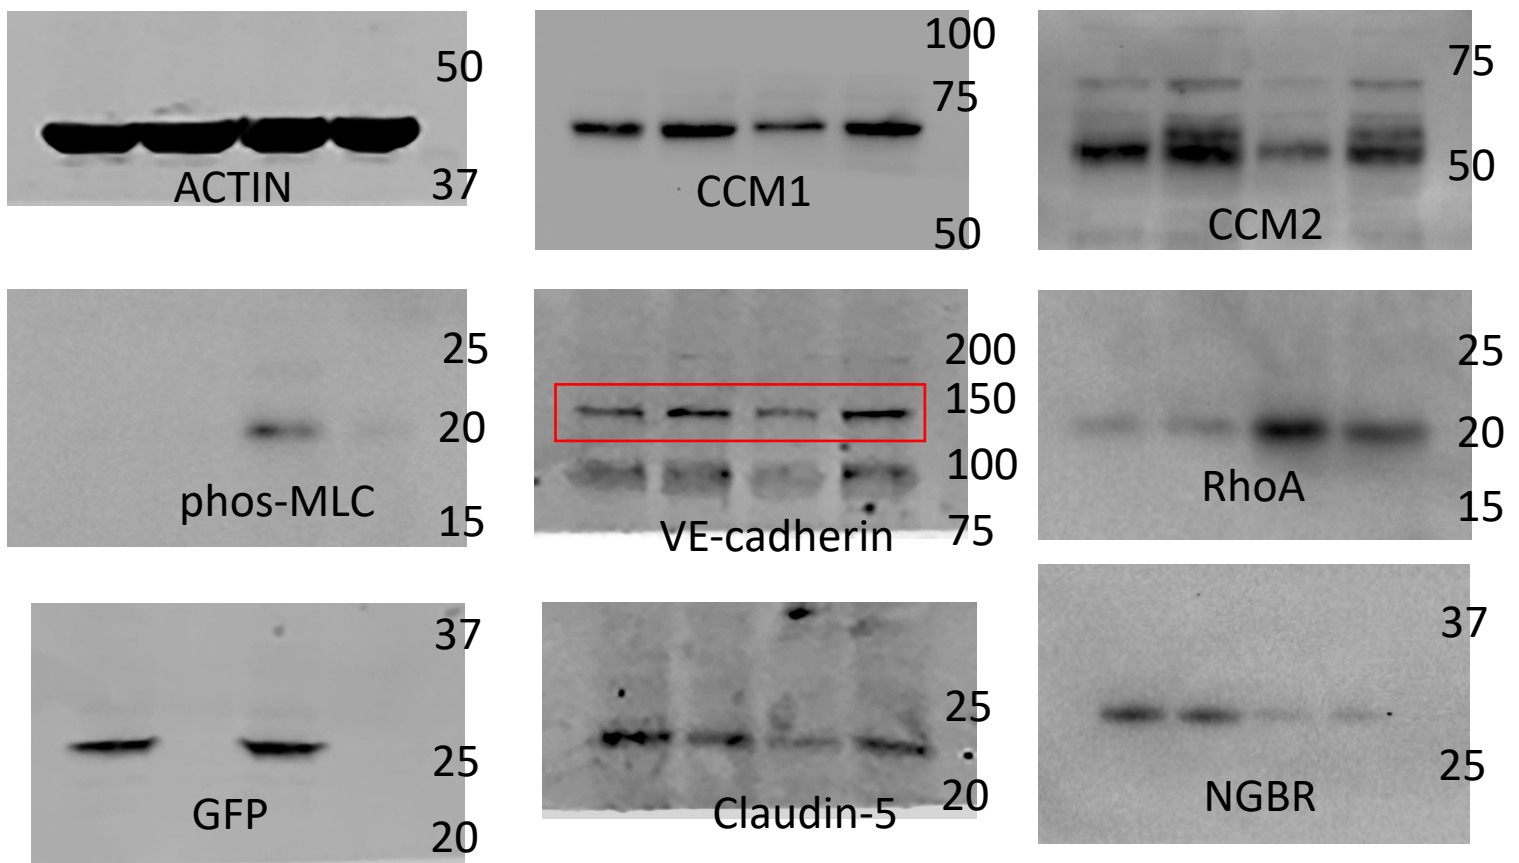

Full unedited gel for Figure 6D

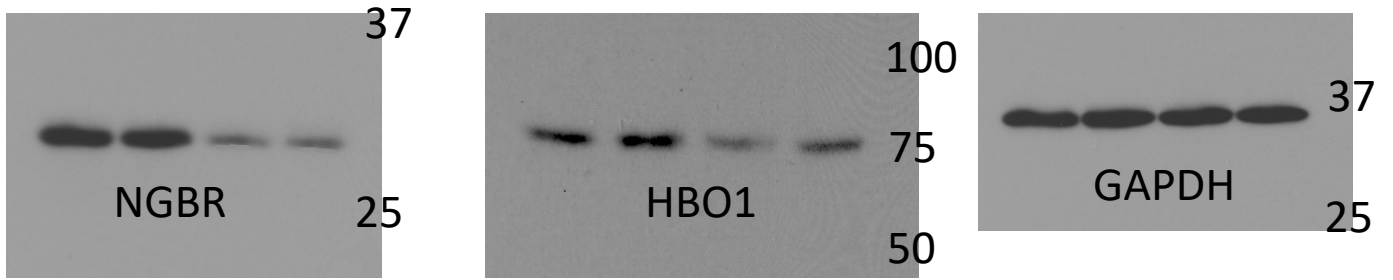

Full unedited gel for Figure 6H

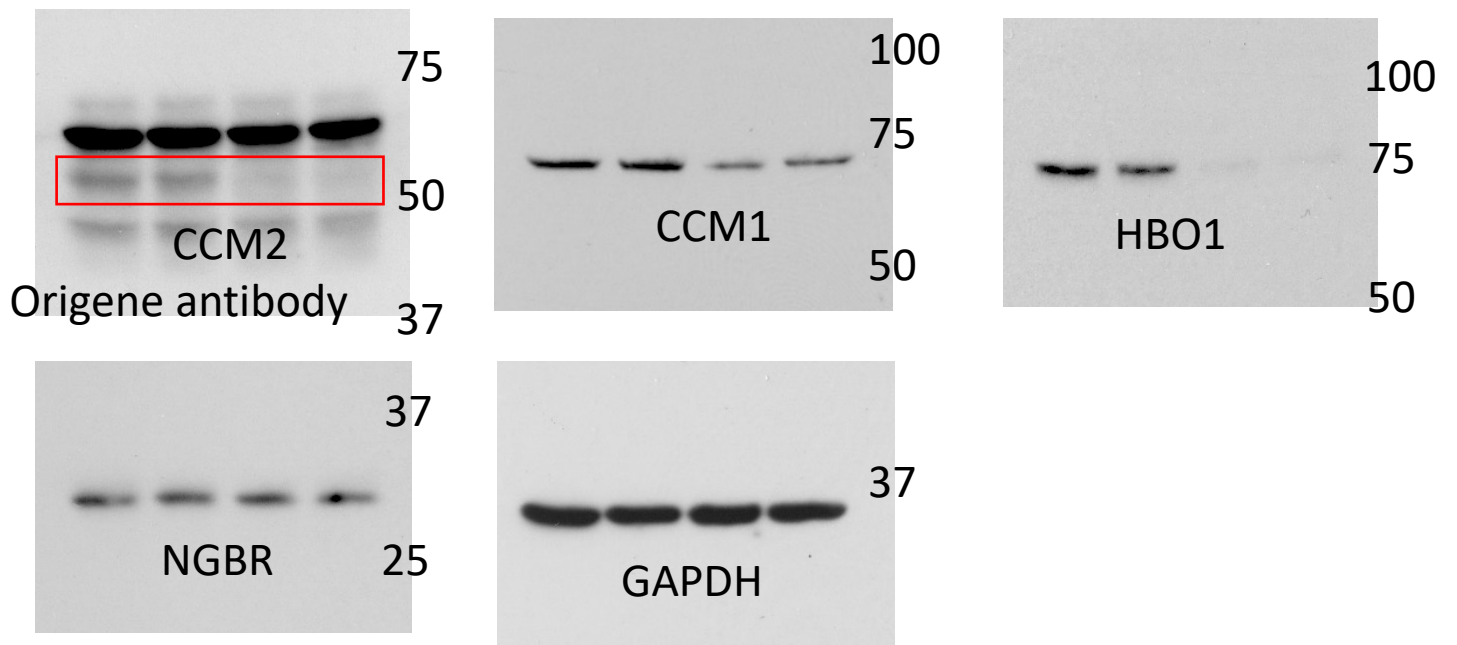

Full unedited gel for Figure 6J

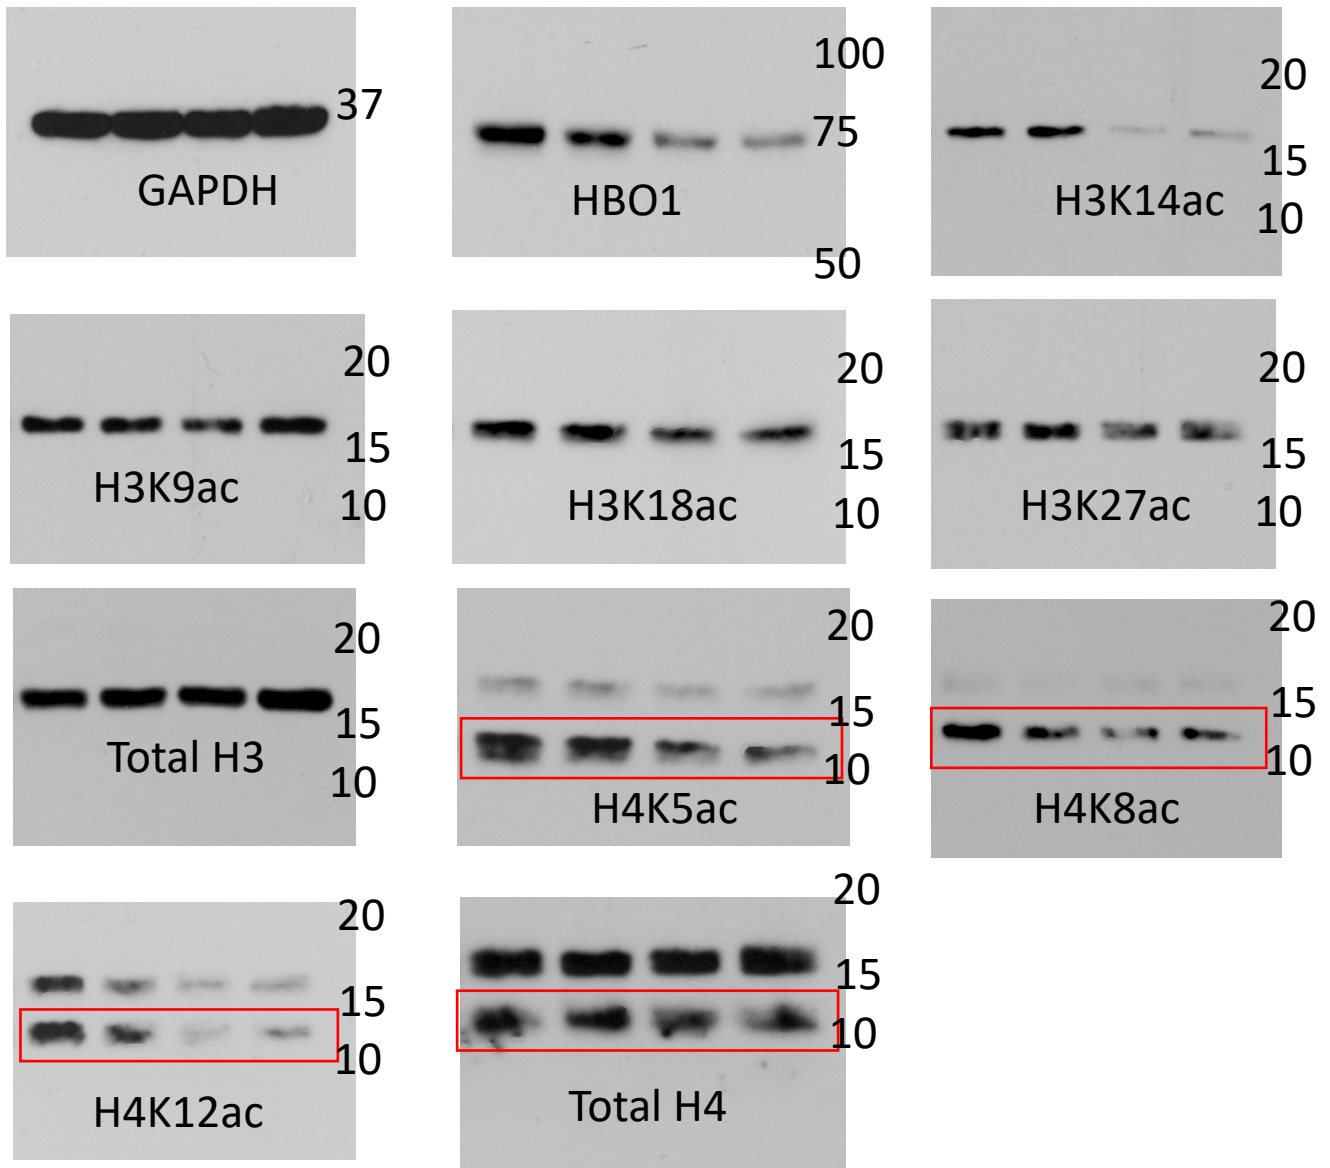

Full unedited gel for Figure 6M

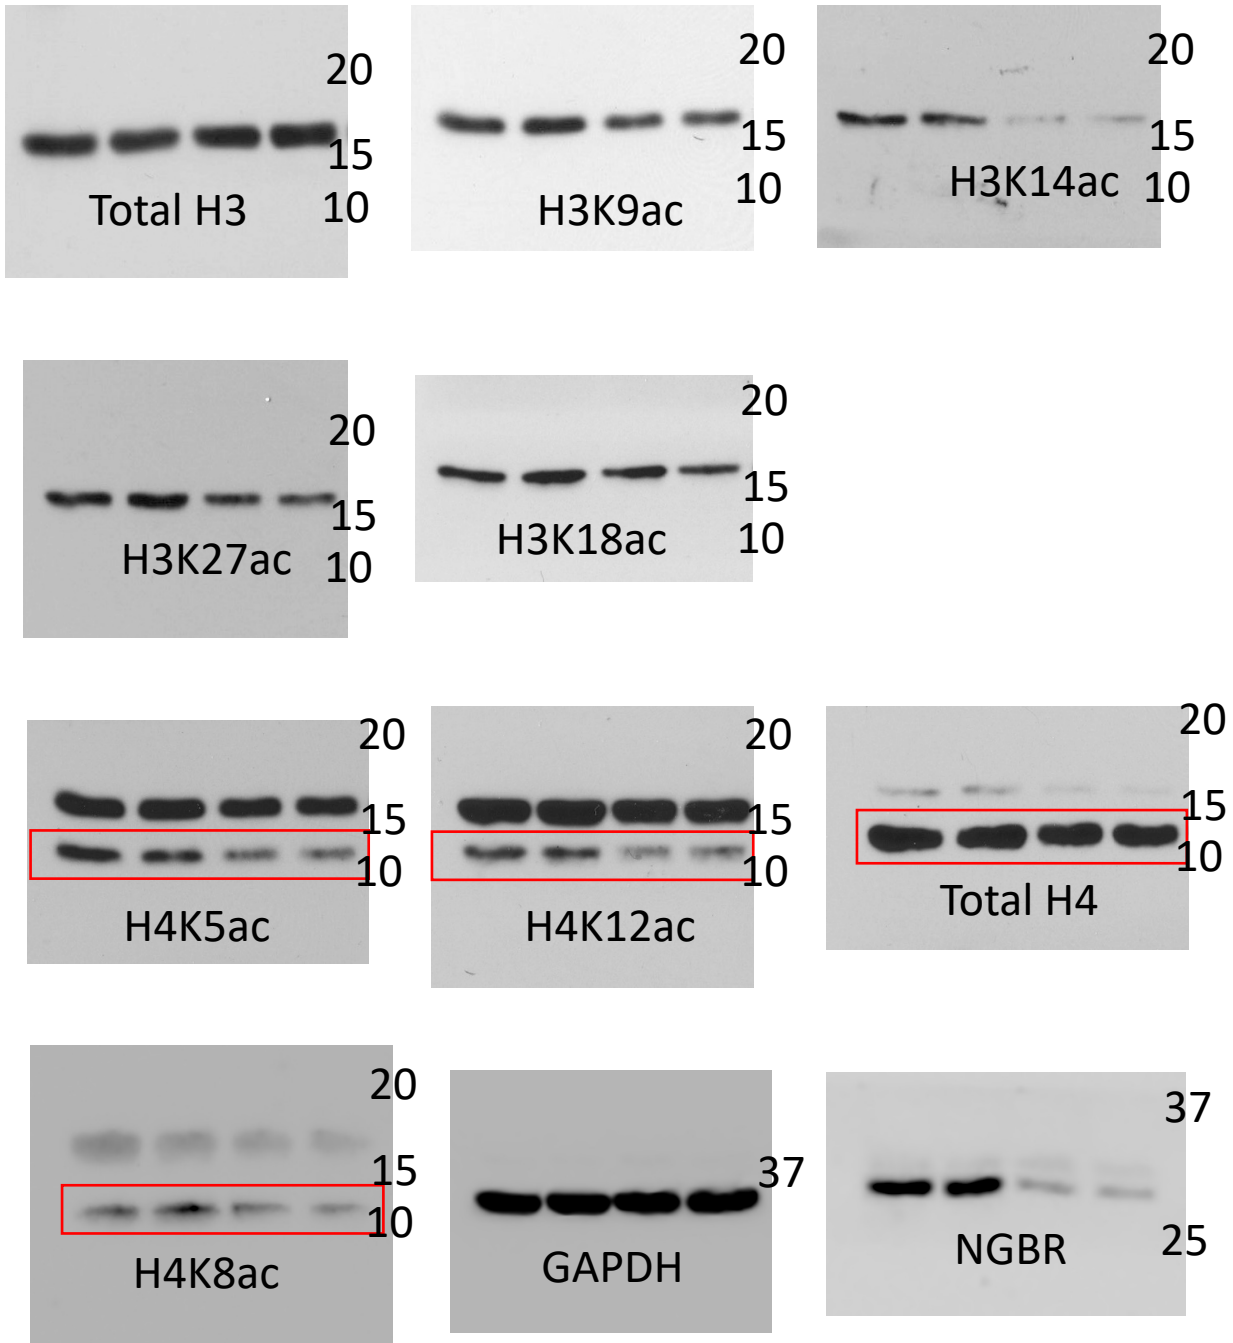

Full unedited gel for Figure 7H

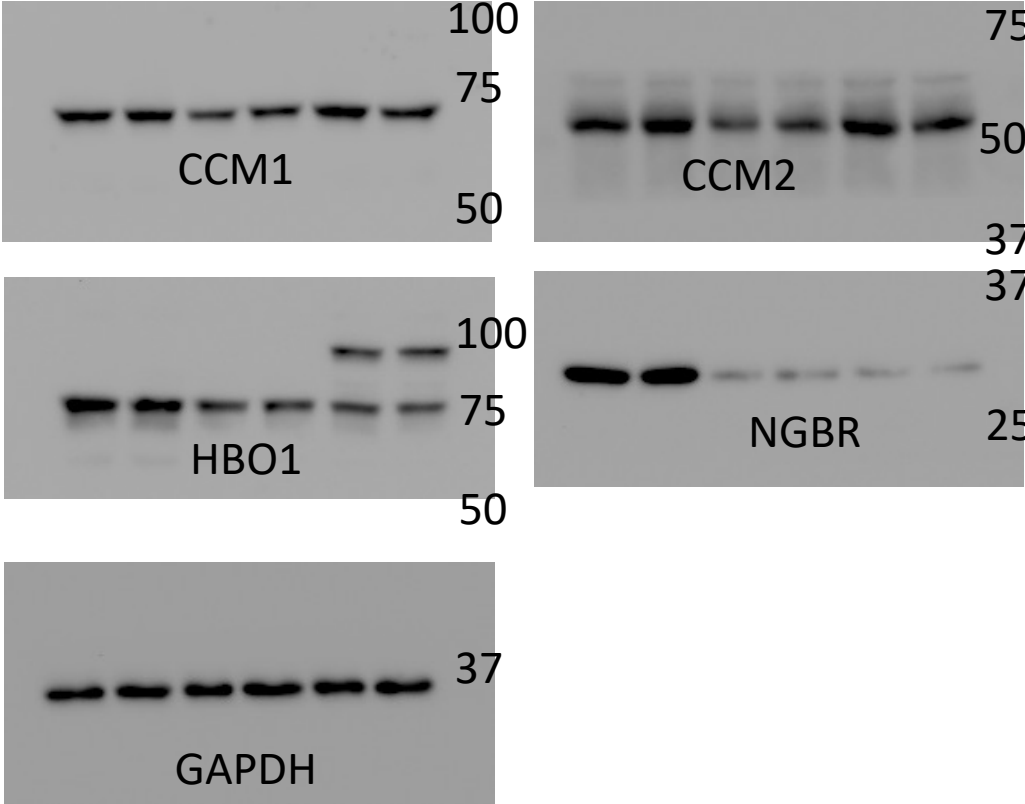



Full unedited gel for Supplementary Figure 2C

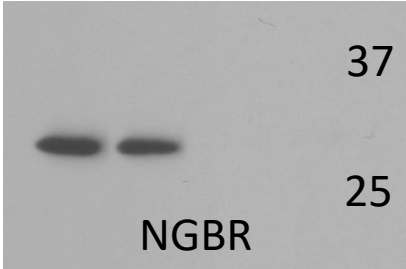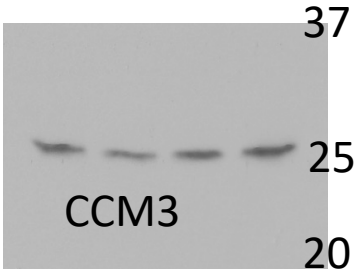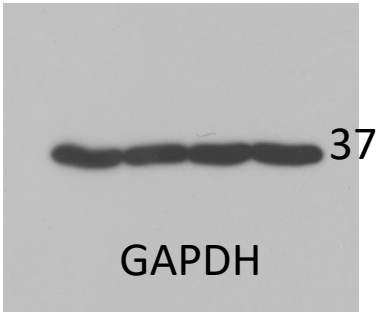

Full unedited gel for Supplementary Figure 3C

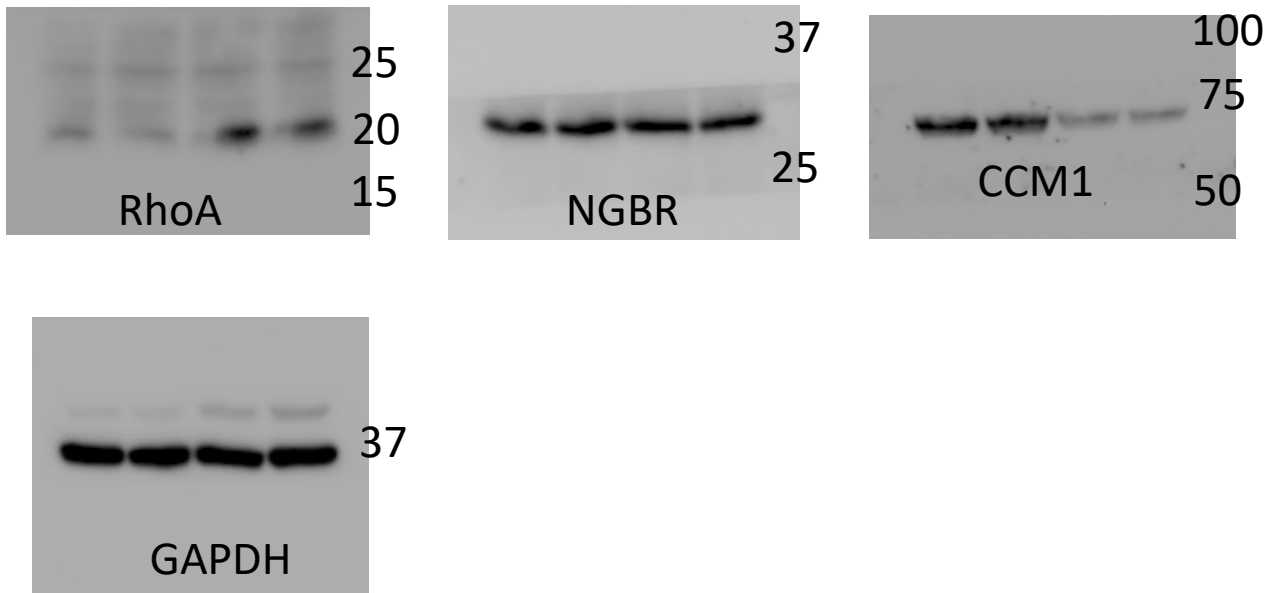

Full unedited gel for Supplementary Figure 3D

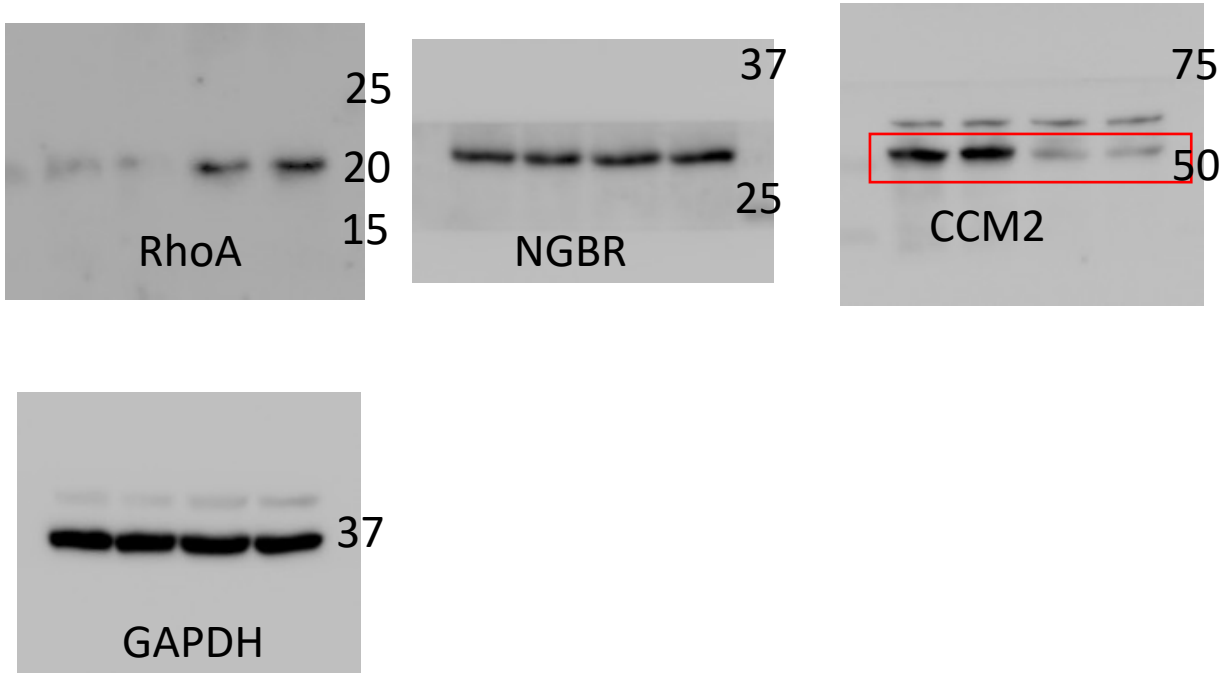

Full unedited gel for Supplementary Figure 4A

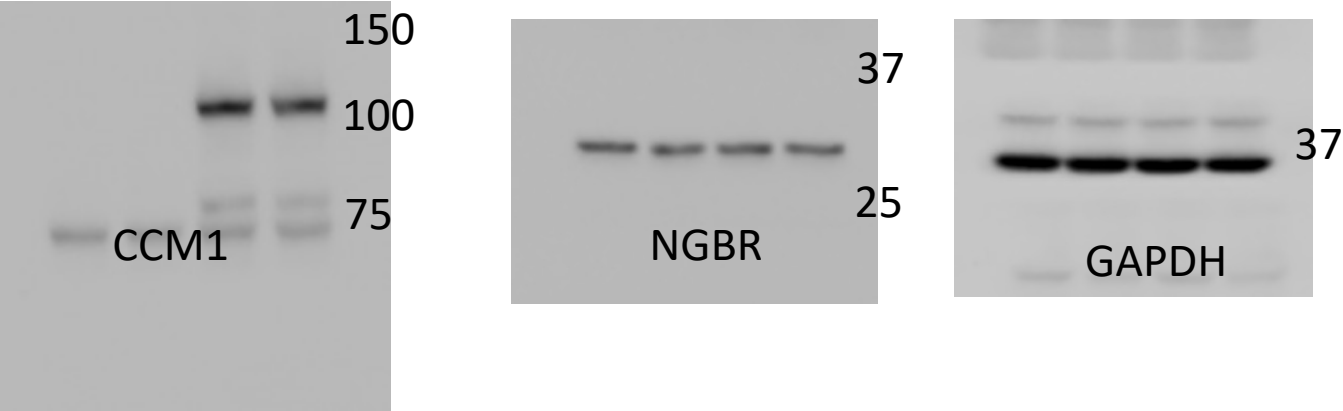

Full unedited gel for Supplementary Figure 4B

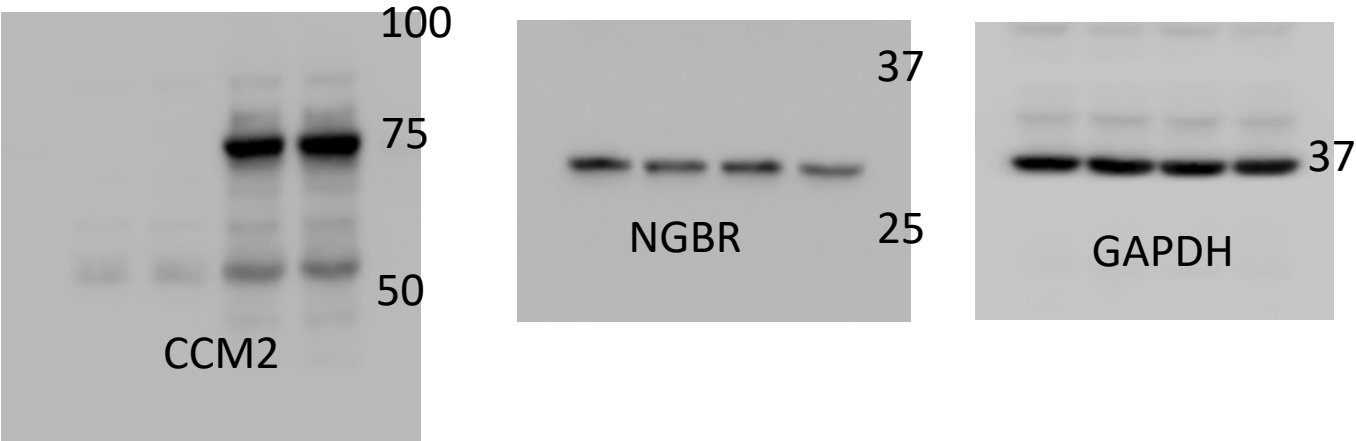

Full unedited gel for Supplementary Figure 7C

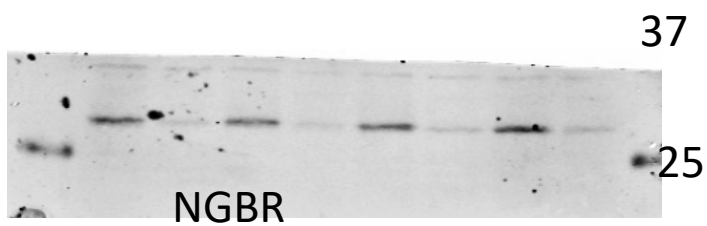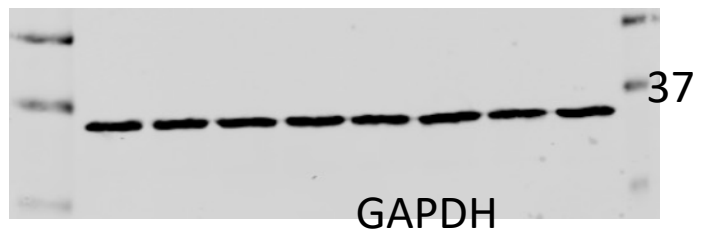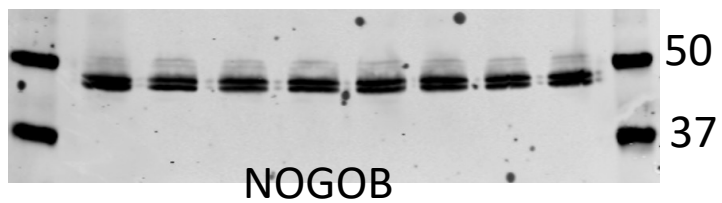

Full unedited gel for Supplementary Figure 8D

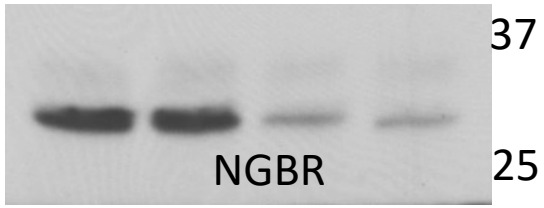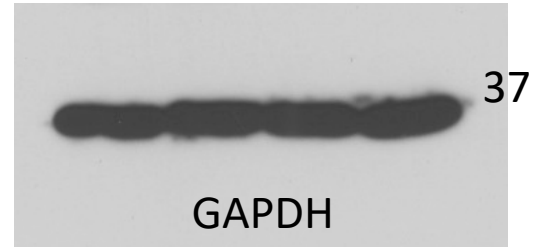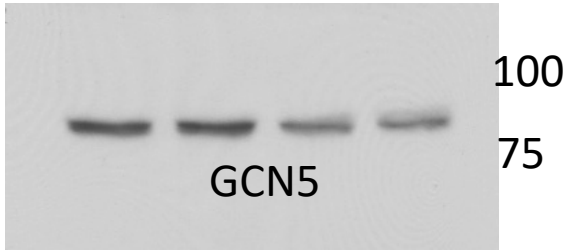

Full unedited gel for Supplementary Figure 8E

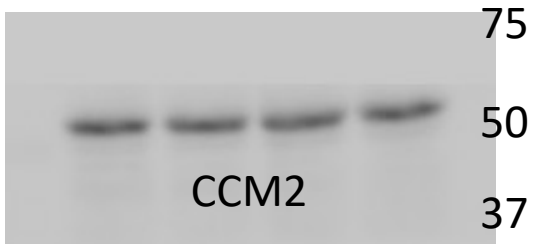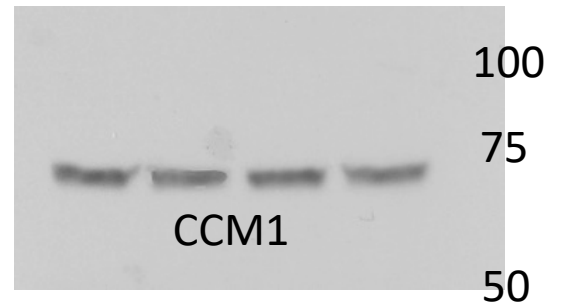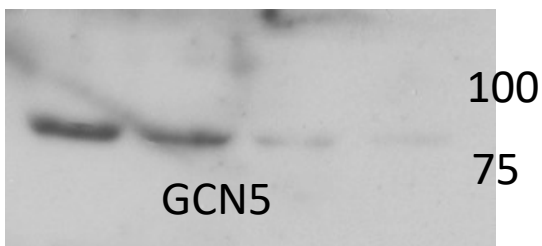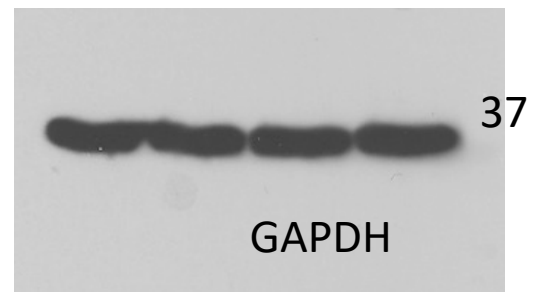

Full unedited gel for Supplementary Figure 9A

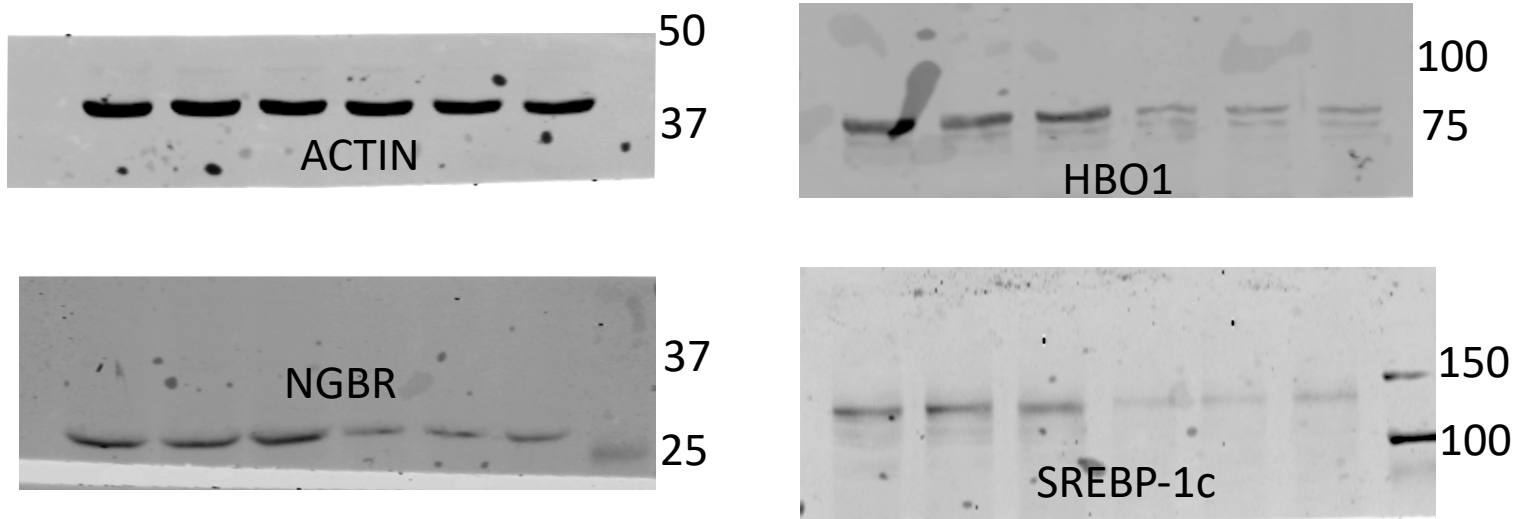

Full unedited gel for Supplementary Figure 9C

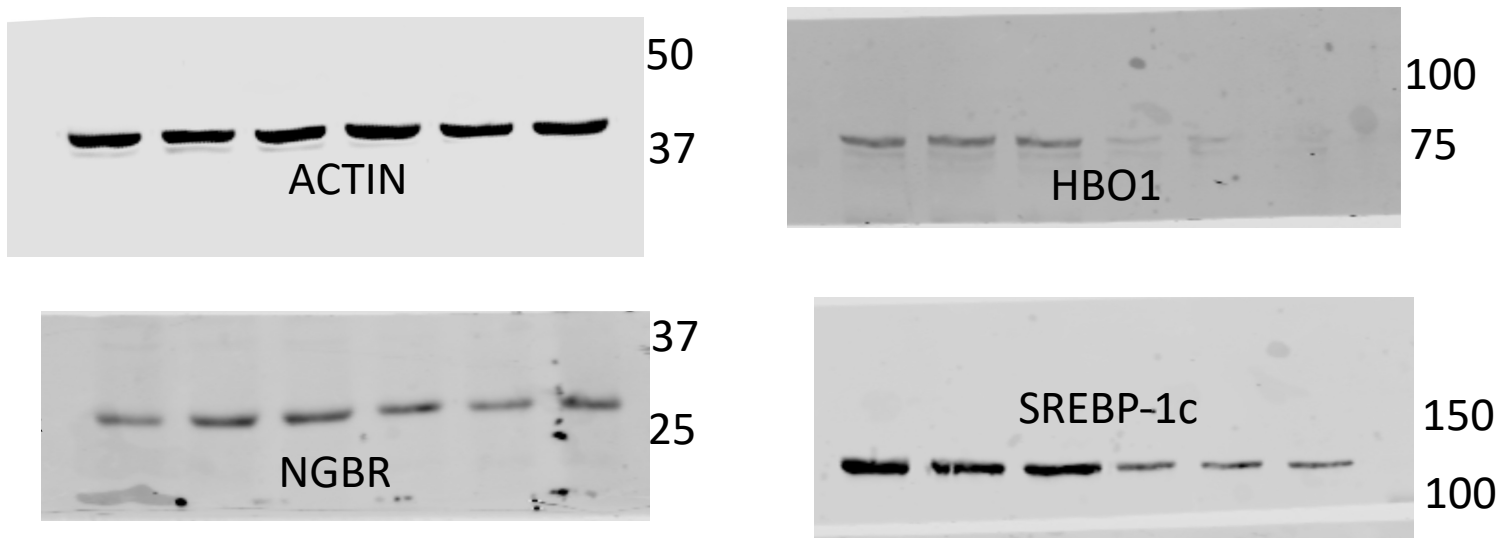

Full unedited gel for Supplementary Figure 11B

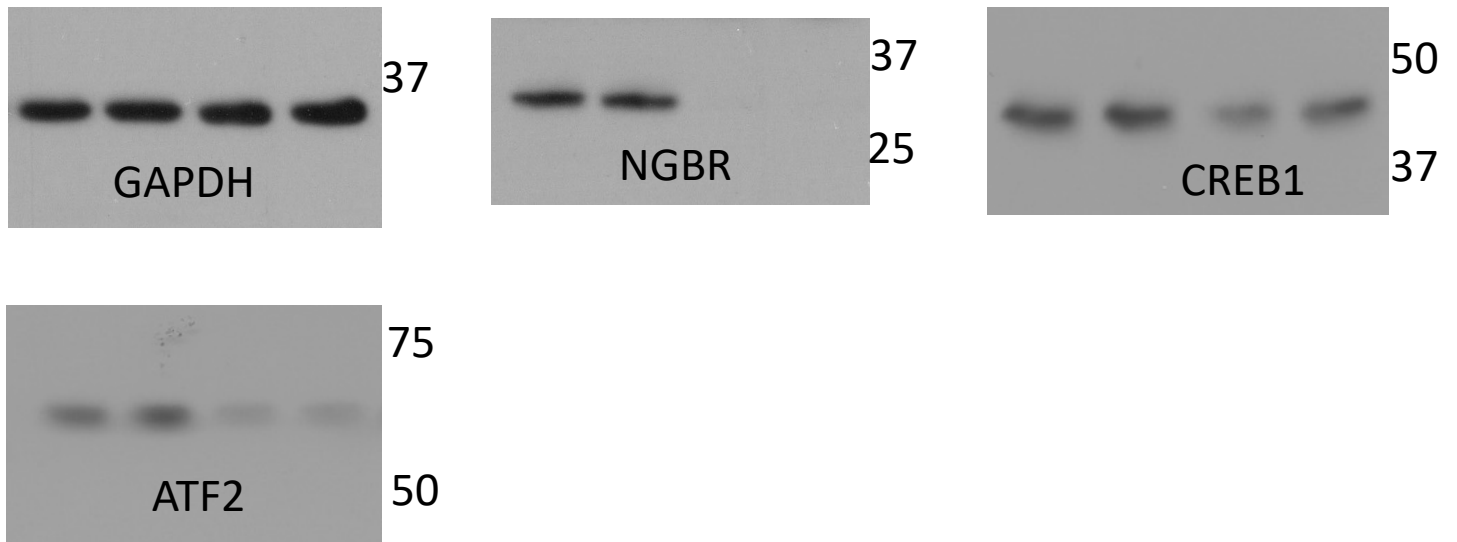

Full unedited gel for Supplementary Figure 11C

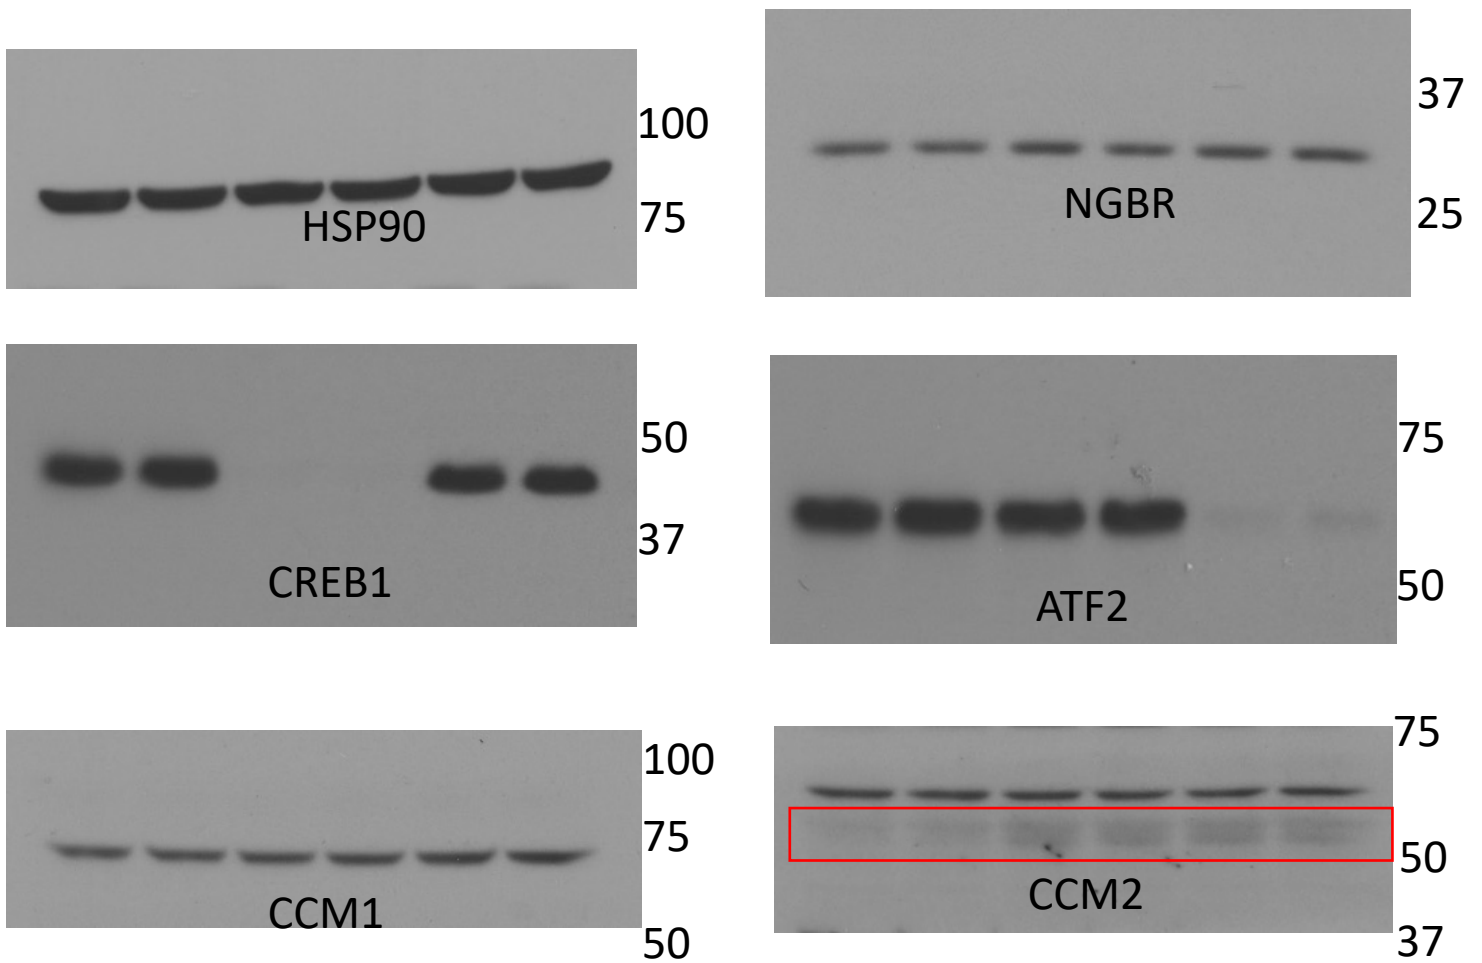

Supplement: sd1 [file 1]
