# Supplementary material for: NOGOB receptor deficiency increases cerebrovascular permeability and hemorrhage via impairing histone acetylation–mediated CCM1/2 expression
Source: JCI journal article supplement (doi:10.1172/jci151382), 2022-03-22
Supplement: sd1 [file 1]

301 Moved Permanently

# Moved Permanently

The document has moved here.
